# Supplementary material for: Extreme Learning Machine-Based Model for Solubility Estimation of Hydrocarbon Gases in Electrolyte Solutions
Source: Preprints.org preprint supplement (doi:10.20944/preprints202001.0010.v1), 2020-01-02
Supplement: Supplementary file 1 [file supplementary]

## Sheet: Sheet1
idx	T	P	I	CO2	N2	Solubility
1	9.97	1.012	0	0	99.99	0.000144
1	1.04	1.9	0	0	99.99	0.000325
1	19.97	0.984	0	0	99.99	0.000119
1	24.92	1.004	0	0	99.99	0.000114
1	14.96	0.966	0	0	99.99	0.000132
1	69.83	4.956	0	0	99.99	0.00039
1	89.75	1.9	0	0	99.99	0.000146
1	9.98	2.413	0	0	99.99	0.000344
1	69.83	6.941	0	0	99.99	0.000535
1	35.03	2.196	0	0	99.99	0.000215
1	14.94	2.395	0	0	99.99	0.000316
1	5.04	3.99	0	0	99.99	0.000613
1	5.04	2.99	0	0	99.99	0.000468
1	69.84	0.992	0	0	99.99	7.7e-05
1	49.98	3.542	0	0	99.99	0.000303
1	9.98	4.877	0	0	99.99	0.000668
1	24.95	2.233	0	0	99.99	0.000259
1	14.96	4.042	0	0	99.99	0.000517
1	24.89	6.967	0	0	99.99	0.000746
1	19.94	6.945	0	0	99.99	0.000788
1	5.01	4.934	0	0	99.99	0.000739
1	19.93	2.511	0	0	99.99	0.000302
1	35.08	1.04	0	0	99.99	0.000103
1	5.06	1.763	0	0	99.99	0.000286
1	35.04	7.032	0	0	99.99	0.000655
1	1.11	6.775	0	0	99.99	0.001073
1	89.85	3.396	0	0	99.99	0.000252
1	10.03	5.825	0	0	99.99	0.000797
1	49.98	2.031	0	0	99.99	0.000185
1	19.94	5.655	0	0	99.99	0.000657
1	14.96	7.003	0	0	99.99	0.000861
1	24.93	4.745	0	0	99.99	0.000521
1	1.03	3.006	0	0	99.99	0.000511
1	49.98	4.957	0	0	99.99	0.000417
1	19.94	3.964	0	0	99.99	0.00047
1	4.9	5.9	0	0	99.99	0.000871
1	10.01	7.16	0	0	99.99	0.000954
1	49.99	7.043	0	0	99.99	0.000593
1	1.06	5.993	0	0	99.99	0.000963
1	35.03	4.18	0	0	99.99	0.0004
1	5.02	6.916	0	0	99.99	0.001015
1	1.04	4.868	0	0	99.99	0.000795
1	14.96	5.444	0	0	99.99	0.000683
1	1.03	3.837	0	0	99.99	0.000636
1	24.95	3.717	0	0	99.99	0.000411
1	30	7.11856	23.0884	0	99.99	0.000272
1	30	2.46014	9.98938	0	99.99	0.000143
1	30	3.06656	37.3656	0	99.99	8.4e-05
1	30	4.89272	23.0598	0	99.99	0.000311
1	30	1.26108	12.4374	0	99.99	7.9e-05
1	30	2.48082	12.4374	0	99.99	0.000178
1	30	5.65075	23.0884	0	99.99	0.000186
1	30	7.25639	55.3943	0	99.99	0.000183
1	30	4.20361	12.4374	0	99.99	0.000324
1	30	4.43101	43.7209	0	99.99	0.000137
1	30	4.08646	23.0598	0	99.99	0.000223
1	30	7.60095	43.7209	0	99.99	0.000264
1	30	4.72044	26.2047	0	99.99	0.000301
1	30	3.14926	23.0884	0	99.99	8.8e-05
1	30	5.97463	37.4774	0	99.99	0.00017
1	30	2.6531	23.0598	0	99.99	0.000134
1	30	4.54816	37.3656	0	99.99	0.000139
1	30	1.24041	5.20249	0	99.99	9.4e-05
1	30	7.25639	12.9053	0	99.99	0.000414
1	30	4.41034	23.0884	0	99.99	0.000139
1	30	4.54816	37.4774	0	99.99	0.000125
1	30	3.82459	27.9762	0	99.99	0.000213
1	30	1.10259	0	0	99.99	0.00011
1	30	2.75646	26.2047	0	99.99	0.000123
1	30	3.06656	44.5559	0	99.99	8.5e-05
1	30	4.6722	44.5559	0	99.99	0.000146
1	30	3.82459	12.9053	0	99.99	0.000202
1	30	2.37745	5.20249	0	99.99	0.000174
1	30	2.68755	27.9762	0	99.99	0.000146
1	30	5.44401	12.4374	0	99.99	0.000388
1	30	6.4639	27.9762	0	99.99	0.000362
1	30	6.30541	23.0598	0	99.99	0.000351
1	30	2.72201	12.9053	0	99.99	0.000129
1	30	7.21504	44.5559	0	99.99	0.000286
1	30	6.02976	26.2047	0	99.99	0.000299
1	30	5.72655	37.3656	0	99.99	0.000213
1	30	3.10102	0	0	99.99	0.000335
1	30	5.91261	44.5559	0	99.99	0.000213
1	30	6.13313	12.9053	0	99.99	0.000346
1	30	5.91261	9.98938	0	99.99	0.000568
1	30	6.98074	37.3656	0	99.99	0.000318
1	30	3.44558	9.98938	0	99.99	0.000286
1	30	6.51214	5.20249	0	99.99	0.00055
1	30	6.63618	43.7209	0	99.99	0.000238
1	30	5.05122	0	0	99.99	0.000552
1	30	5.16837	12.9053	0	99.99	0.000281
1	30	5.58184	27.9762	0	99.99	0.00031
1	30	4.06578	0	0	99.99	0.000428
1	30	4.57573	9.98938	0	99.99	0.000384
1	30	5.87816	43.7209	0	99.99	0.000178
1	30	5.40956	9.98938	0	99.99	0.000473
1	30	4.82381	27.9762	0	99.99	0.000244
1	30	3.51449	5.20249	0	99.99	0.000256
1	30	5.89194	0	0	99.99	0.000637
1	30	4.58262	5.20249	0	99.99	0.00037
1	30	5.49914	5.20249	0	99.99	0.000468
1	35	8	0	87.7	12.3	0.000119
1	45	8	0	88.5	11.5	0.000106
1	45	16	0	89.6	10.4	0.000265
1	35	16	0	59.8	40.2	0.000634
1	35	8	0	83.6	16.4	0.000139
1	45	12	0	88.7	11.3	0.000192
1	35	16	0	48.7	51.3	0.00079
1	35	16	0	83	17	0.000398
1	45	12	0	81.9	18.1	0.000238
1	35	12	0	87.6	12.4	0.000232
1	35	12	0	87.6	12.4	0.000325
1	45	12	0	0	100	0.000901
1	45	12	0	43.6	56.4	0.000581
1	45	8	0	41.7	58.3	0.000417
1	35	12	0	82.6	17.4	0.000291
1	45	8	0	72.7	27.3	0.000217
1	35	8	3.99	57.8	42.2	0.000241
1	35	12	0	0	100	0.00101
1	45	8	0	0	100	0.000611
1	45	16	0	44.5	55.5	0.000787
1	45	12	0	55.9	44.1	0.000466
1	45	16	0	81.2	18.8	0.000378
1	35	16	0	76.7	23.3	0.00049
1	45	8	0	56.9	43.1	0.000307
1	45	16	0	71.5	28.5	0.000487
1	35	8	0	76.8	23.2	0.000224
1	35	12	0	60.4	39.6	0.000474
1	35	8	3.99	17.2	82.8	0.000484
1	35	16	0	0	100	0.00122
1	45	16	0	57.9	42.1	0.000625
1	45	8	0	77.8	22.2	0.000165
1	35	12	0	76	24	0.000331
1	35	8	0	0	100	0.00078
1	45	12	0	72.2	27.8	0.00035
1	45	16	0	0	100	0.00109
1	35	12	0	37.5	62.5	0.00068
1	35	8	0	61.6	38.4	0.000322
1	35	8	3.99	0	100	0.000582
1	35	8	0	45.2	54.8	0.000432
2	40	10	0	99.99	0	0.0207
2	40	10	0.99	99.99	0	0.0203
2	40	10	3	99.99	0	0.0192
2	50	10	0	99.99	0	0.0197
2	50	15	0	99.99	0	0.0209
2	30	15	3	99.99	0	0.022
2	50	10	0.99	99.99	0	0.0188
2	40	15	0	99.99	0	0.0223
2	40	10	2	99.99	0	0.0201
2	40	15	2	99.99	0	0.0212
2	60	15	0	99.99	0	0.0204
2	60	20	0	99.99	0	0.0225
2	50	10	2	99.99	0	0.0182
2	50	10	3	99.99	0	0.0177
2	50	15	0.99	99.99	0	0.0201
2	60	10	0.99	99.99	0	0.0178
2	60	20	3	99.99	0	0.0191
2	30	10	0	99.99	0	0.0238
2	30	20	3	99.99	0	0.0227
2	30	20	0	99.99	0	0.0257
2	60	10	2	99.99	0	0.0166
2	40	15	3	99.99	0	0.0204
2	50	20	0	99.99	0	0.0229
2	60	10	3	99.99	0	0.0165
2	30	20	0.99	99.99	0	0.0246
2	30	15	2	99.99	0	0.0223
2	30	10	2	99.99	0	0.0215
2	30	15	0.99	99.99	0	0.0235
2	60	15	2	99.99	0	0.0191
2	50	15	3	99.99	0	0.0191
2	50	20	2	99.99	0	0.0212
2	40	20	0	99.99	0	0.0234
2	60	15	3	99.99	0	0.0183
2	40	20	3	99.99	0	0.0214
2	60	20	0.99	99.99	0	0.0211
2	60	15	0.99	99.99	0	0.0197
2	30	20	2	99.99	0	0.0232
2	30	10	0.99	99.99	0	0.0227
2	50	15	2	99.99	0	0.0196
2	30	10	3	99.99	0	0.0209
2	60	20	2	99.99	0	0.0203
2	40	20	2	99.99	0	0.0219
2	60	10	0	99.99	0	0.0185
2	40	20	0.99	99.99	0	0.0227
2	30	15	0	99.99	0	0.0248
2	50	20	0.99	99.99	0	0.0218
2	50	20	3	99.99	0	0.0203
2	40	15	0.99	99.99	0	0.0216
2	35	16	0	100	0	0.0202
2	45	8	0	100	0	0.0225
2	35	8	3.99	100	0	0.0197
2	35	12	0	87.6	12.4	0.0229
2	35	8	3.99	89.2	10.8	0.0174
2	35	12	0	100	0	0.025
2	45	12	0	55.9	44.1	0.0143
2	45	12	0	100	0	0.023
2	35	8	0	100	0	0.0224
2	35	8	3.99	57.8	42.2	0.0123
2	35	8	0	100	0	0.0238
2	45	16	0	71.5	28.5	0.018
2	35	16	0	83	17	0.0218
2	45	12	0	72.2	27.8	0.0173
2	35	16	0	48.7	51.3	0.0157
2	35	8	0	83.6	16.4	0.0191
2	35	8	0	87.7	12.3	0.0198
2	35	12	0	60.4	39.6	0.0172
2	45	12	0	43.6	56.4	0.0109
2	45	16	0	81.2	18.8	0.0198
2	45	16	0	89.6	10.4	0.0208
2	35	8	3.99	17.2	82.8	0.00416
2	35	12	0	37.5	62.5	0.0116
2	45	16	0	44.5	55.5	0.0129
2	45	12	0	81.9	18.1	0.0188
2	35	8	0	76.8	23.2	0.0174
2	35	16	0	59.8	40.2	0.0179
2	45	12	0	88.7	11.3	0.0202
2	35	12	0	82.6	17.4	0.0208
2	35	12	0	87.6	12.4	0.0218
2	45	8	0	41.7	58.3	0.009
2	45	16	0	57.9	42.1	0.0155
2	35	8	0	61.6	38.4	0.015
2	45	8	0	88.5	11.5	0.0177
2	35	16	0	76.7	23.3	0.0204
2	35	8	3.99	35	65	0.00762
2	35	8	3.99	84.3	15.7	0.0167
2	35	12	0	76	24	0.0198
2	35	8	0	45.2	54.8	0.0111
2	45	8	0	56.9	43.1	0.012
2	45	8	0	77.8	22.2	0.0156
2	45	8	0	72.7	27.3	0.015
2	50.05	4.05	0	99.99	0	0.0109
2	50.05	5.06	0	99.99	0	0.0137
2	60.05	7.08	0	99.99	0	0.0157
2	79.95	8.08	0	99.99	0	0.014
2	60.05	5.06	0	99.99	0	0.0121
2	79.95	9.09	0	99.99	0	0.0151
2	79.95	10.09	0	99.99	0	0.016
2	79.95	7.08	0	99.99	0	0.0128
2	60.05	6.06	0	99.99	0	0.0138
2	79.95	6.06	0	99.99	0	0.0114
2	60.05	9.09	0	99.99	0	0.0179
2	79.95	4.05	0	99.99	0	0.008
2	60.05	12.1	0	99.99	0	0.0201
2	50.05	7.08	0	99.99	0	0.0176
2	79.95	12.1	0	99.99	0	0.0176
2	60.05	11.1	0	99.99	0	0.0195
2	60.05	14.11	0	99.99	0	0.0208
2	60.05	8.08	0	99.99	0	0.0166
2	50.05	6.06	0	99.99	0	0.0161
2	79.95	13.1	0	99.99	0	0.0184
2	50.05	14.11	0	99.99	0	0.0217
2	60.05	4.05	0	99.99	0	0.0096
2	50.05	12.1	0	99.99	0	0.0214
2	50.05	10.09	0	99.99	0	0.0205
2	79.95	11.1	0	99.99	0	0.0172
2	60.05	10.09	0	99.99	0	0.0186
2	50.05	8.08	0	99.99	0	0.019
2	50.05	9.09	0	99.99	0	0.02
2	50.05	11.1	0	99.99	0	0.021
2	101	5.6728	10.1	99.99	0	0.0081
2	76	2.2286	20.2	99.99	0	0.0022
2	76	7.3949	20.2	99.99	0	0.0058
2	75.5	1.6208	10.1	99.99	0	0.0027
2	101	21.5769	10.1	99.99	0	0.014
2	76	2.3299	20.2	99.99	0	0.0022
2	75.5	1.6208	10.1	99.99	0	0.0026
2	76	7.3949	20.2	99.99	0	0.006
2	101	21.5769	10.1	99.99	0	0.0185
2	120	2.3299	0	99.99	0	0.004
2	76	31.8082	30.2	99.99	0	0.006
2	120	56.9306	0	99.99	0	0.0288
2	120	57.741	0	99.99	0	0.029
2	75.5	6.2806	10.1	99.99	0	0.0081
2	76	32.3147	30.2	99.99	0	0.0061
2	76	7.3949	30.2	99.99	0	0.0036
2	75.5	6.3819	10.1	99.99	0	0.0083
2	101	45.7876	0	99.99	0	0.0251
2	76	7.4962	30.2	99.99	0	0.0037
2	120	2.3299	0	99.99	0	0.0038
2	101	2.3299	20.2	99.99	0	0.0017
2	101	10.8391	0	99.99	0	0.015
2	101	9.2183	20.2	99.99	0	0.0058
2	101	1.7221	10.1	99.99	0	0.0022
2	121	2.5325	20.2	99.99	0	0.0017
2	121	7.6988	10.1	99.99	0	0.0061
2	121	7.8001	10.1	99.99	0	0.0069
2	101	11.0417	0	99.99	0	0.0153
2	120	6.8884	0	99.99	0	0.01
2	121	14.182	10.1	99.99	0	0.0113
2	101	32.416	0	99.99	0	0.0233
2	121	2.5325	20.2	99.99	0	0.0019
2	101	28.9718	10.1	99.99	0	0.0147
2	121	15.4989	10.1	99.99	0	0.0111
2	101	32.9225	0	99.99	0	0.0231
2	76	16.7145	20.2	99.99	0	0.0088
2	101	7.4962	30.2	99.99	0	0.0031
2	101	8.9144	20.2	99.99	0	0.0059
2	101	23.7042	30.2	99.99	0	0.0054
2	101	5.7741	0	99.99	0	0.0108
2	76	16.3093	30.2	99.99	0	0.0052
2	101	62.2995	0	99.99	0	0.0282
2	121	6.3819	20.2	99.99	0	0.0039
2	121	6.3819	20.2	99.99	0	0.0039
2	76	46.0915	30.2	99.99	0	0.0066
2	101	15.2963	30.2	99.99	0	0.0047
2	101	24.1094	30.2	99.99	0	0.0052
2	121	47.4084	30.2	99.99	0	0.0061
2	101	15.6002	30.2	99.99	0	0.0049
2	101	1.7221	10.1	99.99	0	0.0021
2	121	8.4079	30.2	99.99	0	0.0031
2	101	35.1511	10.1	99.99	0	0.0162
2	101	12.156	10.1	99.99	0	0.0113
2	120	18.9431	0	99.99	0	0.02
2	120	6.9897	0	99.99	0	0.0105
2	120	18.8418	0	99.99	0	0.0193
2	121	2.1273	10.1	99.99	0	0.0027
2	121	2.1273	10.1	99.99	0	0.0027
2	76	28.5666	20.2	99.99	0	0.0097
2	121	45.585	30.2	99.99	0	0.0063
2	101	29.5796	20.2	99.99	0	0.0099
2	101	39.9122	10.1	99.99	0	0.0168
2	101	17.1197	20.2	99.99	0	0.0084
2	76	16.8158	20.2	99.99	0	0.0086
2	101	28.9718	10.1	99.99	0	0.0152
2	101	26.4393	30.2	99.99	0	0.0058
2	101	2.3299	20.2	99.99	0	0.0018
2	101	12.156	10.1	99.99	0	0.0112
2	101	14.3846	20.2	99.99	0	0.0074
2	101	14.3846	20.2	99.99	0	0.0074
2	76	29.377	20.2	99.99	0	0.0098
2	121	30.5926	30.2	99.99	0	0.0058
2	101	29.377	0	99.99	0	0.0221
2	121	29.9848	30.2	99.99	0	0.0058
2	121	49.7383	20.2	99.99	0	0.011
2	121	15.195	20.2	99.99	0	0.0073
2	121	15.195	20.2	99.99	0	0.0073
2	121	8.6105	30.2	99.99	0	0.0031
2	101	39.4057	30.2	99.99	0	0.0064
2	101	35.6576	10.1	99.99	0	0.0159
2	101	39.3044	30.2	99.99	0	0.0064
2	121	50.0422	30.2	99.99	0	0.0065
2	121	59.2605	10.1	99.99	0	0.0184
2	121	65.845	20.2	99.99	0	0.0115
2	121	51.2578	20.2	99.99	0	0.0113
2	121	51.663	30.2	99.99	0	0.0069
2	121	44.2681	10.1	99.99	0	0.0168
2	120	36.468	0	99.99	0	0.025
2	101	29.377	20.2	99.99	0	0.0097
2	76	45.9902	20.2	99.99	0	0.0107
2	121	62.9073	10.1	99.99	0	0.0181
2	75.5	62.806	10.1	99.99	0	0.0192
2	101	40.7226	30.2	99.99	0	0.0063
2	76	46.598	20.2	99.99	0	0.0108
2	76	1.5195	30.2	99.99	0	0.0009
2	76	1.5195	30.2	99.99	0	0.0009
2	101	57.3358	20.2	99.99	0	0.0116
2	101	21.4756	0	99.99	0	0.0207
2	121	47.0032	20.2	99.99	0	0.011
2	121	46.598	10.1	99.99	0	0.0167
2	101	58.1462	20.2	99.99	0	0.0118
2	120	70.3022	0	99.99	0	0.03
2	76	57.9436	20.2	99.99	0	0.0117
2	121	15.195	30.2	99.99	0	0.0045
2	76	60.78	20.2	99.99	0	0.0118
2	121	14.9924	30.2	99.99	0	0.0045
2	76	16.5119	30.2	99.99	0	0.0051
2	121	71.2139	10.1	99.99	0	0.0193
2	101	38.494	10.1	99.99	0	0.0165
2	101	65.6424	20.2	99.99	0	0.0123
2	101	52.4734	0	99.99	0	0.0266
2	101	17.221	20.2	99.99	0	0.0083
2	121	30.39	10.1	99.99	0	0.0148
2	75.5	43.1538	10.1	99.99	0	0.017
2	121	28.364	20.2	99.99	0	0.0094
2	101	63.819	30.2	99.99	0	0.0071
2	75.5	16.5119	10.1	99.99	0	0.0133
2	120	35.7589	0	99.99	0	0.0248
2	101	62.6034	10.1	99.99	0	0.0186
2	101	56.5254	0	99.99	0	0.0278
2	75.5	59.2605	10.1	99.99	0	0.0184
2	75.5	31.403	10.1	99.99	0	0.0154
2	121	28.5666	20.2	99.99	0	0.0094
2	76	56.1202	30.2	99.99	0	0.007
2	101	7.6988	30.2	99.99	0	0.0033
2	75.5	45.1798	10.1	99.99	0	0.0168
2	75.5	33.2264	10.1	99.99	0	0.0158
2	101	53.1825	30.2	99.99	0	0.007
2	101	58.2475	10.1	99.99	0	0.0185
2	76	43.6603	30.2	99.99	0	0.0067
2	120	65.4398	0	99.99	0	0.0299
2	121	30.0861	10.1	99.99	0	0.0148
2	75.5	16.4106	10.1	99.99	0	0.0133
2	101	21.273	0	99.99	0	0.0205
2	121	67.3645	30.2	99.99	0	0.0074
2	101	50.65	10.1	99.99	0	0.0174
2	121	64.4268	20.2	99.99	0	0.0115
2	76	63.3125	30.2	99.99	0	0.0069
2	101	28.6679	0	99.99	0	0.0223
2	76	53.1825	30.2	99.99	0	0.007
2	121	60.9826	20.2	99.99	0	0.0117
2	35.75	3.737	6.10434	99.99	0	0.0118
2	71.65	3.93	24.9779	99.99	0	0.0032
2	71.83	31.2	32.2518	99.99	0	0.0047
2	36.85	2.84	22.2173	99.99	0	0.0036
2	151.24	27.11	24.9779	99.99	0	0.0081
2	70.68	1.77	6.10434	99.99	0	0.003
2	36.52	1.53	9.98938	99.99	0	0.0045
2	71.91	4.05	22.2173	99.99	0	0.0032
2	36.76	11.2	22.2173	99.99	0	0.0079
2	36.46	2.73	24.9779	99.99	0	0.0036
2	36.76	6	22.2173	99.99	0	0.0065
2	36.48	6.59	24.9779	99.99	0	0.0078
2	70.75	2.04	8.69339	99.99	0	0.0034
2	151.49	17.16	6.10434	99.99	0	0.0146
2	151.23	37.99	24.9779	99.99	0	0.009
2	71.53	5.8	32.2518	99.99	0	0.0028
2	71.83	13.12	22.2173	99.99	0	0.0068
2	70.77	3.61	6.10434	99.99	0	0.0064
2	71.52	2.58	9.98938	99.99	0	0.004
2	71.89	10.25	6.10434	99.99	0	0.0138
2	36.43	1.25	8.69339	99.99	0	0.0038
2	36.68	4.24	8.69339	99.99	0	0.0108
2	101.55	3.13	9.98938	99.99	0	0.0038
2	71.53	6	32.2518	99.99	0	0.0028
2	101.09	2.64	8.69339	99.99	0	0.0029
2	101.5	5.99	24.9779	99.99	0	0.0036
2	50.96	1.07	6.10434	99.99	0	0.0032
2	36.66	7.74	8.69339	99.99	0	0.0175
2	101.77	6.96	6.10434	99.99	0	0.0087
2	151.53	31.71	22.2173	99.99	0	0.0079
2	101.57	7.55	32.2518	99.99	0	0.0026
2	36.13	4.01	9.98938	99.99	0	0.0104
2	151.45	7.6	22.2173	99.99	0	0.0033
2	50.95	4.35	6.10434	99.99	0	0.0106
2	71.05	7.62	8.69339	99.99	0	0.01
2	101.07	10.25	8.69339	99.99	0	0.01
2	71.86	31.25	22.2173	99.99	0	0.008
2	151.25	8.29	24.9779	99.99	0	0.0038
2	101.76	34.93	8.69339	99.99	0	0.0161
2	71.2	7.3	9.98938	99.99	0	0.0098
2	36.13	7.67	9.98938	99.99	0	0.0161
2	71.57	6.12	35.6872	99.99	0	0.0027
2	101.75	15.16	22.2173	99.99	0	0.0064
2	101.87	20.58	32.2518	99.99	0	0.0041
2	101.55	10.02	9.98938	99.99	0	0.0093
2	71.8	13.91	24.9779	99.99	0	0.0068
2	151.18	10.34	32.2518	99.99	0	0.0023
2	150.8	12.63	8.69339	99.99	0	0.0098
2	36.53	3.5	32.2518	99.99	0	0.0027
2	151.24	4.7	32.2518	99.99	0	0.0013
2	150.88	3.95	8.69339	99.99	0	0.0035
2	36.76	20.72	22.2173	99.99	0	0.0092
2	150.95	12.77	9.98938	99.99	0	0.01
2	101.65	15.72	24.9779	99.99	0	0.0064
2	101.57	16.91	35.6872	99.99	0	0.004
2	101.53	15.6	32.2518	99.99	0	0.0038
2	101.57	7.61	35.6872	99.99	0	0.0027
2	101.77	2.99	6.10434	99.99	0	0.0041
2	101.73	37.38	9.98938	99.99	0	0.0161
2	101.74	14.78	6.10434	99.99	0	0.0142
2	150.98	4.39	9.98938	99.99	0	0.0039
2	36.59	23	35.6872	99.99	0	0.0046
2	71.53	13.09	32.2518	99.99	0	0.0037
2	36.59	9	32.2518	99.99	0	0.0049
2	151.27	10.53	35.6872	99.99	0	0.0024
2	101.68	26.29	22.2173	99.99	0	0.008
2	151.48	28.37	8.69339	99.99	0	0.0161
2	151.28	4.64	35.6872	99.99	0	0.0014
2	34.85	24.25	35.6872	99.99	0	0.0049
2	36.44	26	24.9779	99.99	0	0.0081
2	36.55	4.54	35.6872	99.99	0	0.0031
2	101.65	33.45	24.9779	99.99	0	0.0077
2	70.73	13.69	6.10434	99.99	0	0.0158
2	101.57	34.25	35.6872	99.99	0	0.0048
2	71.55	14.54	35.6872	99.99	0	0.0036
2	151.5	19.2	22.2173	99.99	0	0.0063
2	101.69	4.95	22.2173	99.99	0	0.0033
2	151.28	26.82	9.98938	99.99	0	0.0158
2	151.34	16.18	32.2518	99.99	0	0.0035
2	71.93	34.43	24.9779	99.99	0	0.0078
2	71.81	34.52	35.6872	99.99	0	0.0051
2	151.49	29.41	35.6872	99.99	0	0.0048
2	151.52	4	6.10434	99.99	0	0.0041
2	71.8	31.02	9.98938	99.99	0	0.0151
2	151.47	8.68	6.10434	99.99	0	0.0087
2	36.37	31.02	32.2518	99.99	0	0.0056
2	151.48	19.74	8.69339	99.99	0	0.0131
2	71.78	30.58	8.69339	99.99	0	0.0153
2	40	5.01	3.84588	99.99	0	0.0319
2	40	4.01	3.84588	99.99	0	0.0292
2	75	0.54	0	99.99	0	0.00126
2	20	4.96	3.84588	99.99	0	0.0368
2	50	0.6	0	99.99	0	0.00214
2	20	4.03	3.84588	99.99	0	0.0331
2	25	0.61	0	99.99	0	0.00362
2	25	0.98	0	99.99	0	0.00534
2	25	1.97	0	99.99	0	0.00985
2	20	3	3.84588	99.99	0	0.0302
2	25	4.73	0	99.99	0	0.0222
2	100	5.03	0	99.99	0	0.00857
2	100	4.04	0	99.99	0	0.00697
2	75	1	0	99.99	0	0.00241
2	50	4.09	0	99.99	0	0.0113
2	120	2.03	0	99.99	0	0.00326
2	100	5.03	0	99.99	0	0.00874
2	50	1.05	0	99.99	0	0.00331
2	75	3.1	0	99.99	0	0.00688
2	20	0.32	3.84588	99.99	0	0.0189
2	120	4.83	0	99.99	0	0.00715
2	50	4.12	0	99.99	0	0.0116
2	20	0.59	3.84588	99.99	0	0.02
2	100	0.99	0	99.99	0	0.00175
2	120	3.05	0	99.99	0	0.00487
2	20	2.06	3.84588	99.99	0	0.0264
2	75	2.03	0	99.99	0	0.00467
2	75	4.03	0	99.99	0	0.00859
2	100	3.05	0	99.99	0	0.00541
2	25	3.01	0	99.99	0	0.0147
2	50	2.06	0	99.99	0	0.00616
2	75	5.14	0	99.99	0	0.0106
2	25	4.04	0	99.99	0	0.0188
2	50	5.02	0	99.99	0	0.0139
2	120	0.96	0	99.99	0	0.00141
2	50	2.98	0	99.99	0	0.00895
2	120	4.03	0	99.99	0	0.00617
2	20	1.04	3.84588	99.99	0	0.0224
2	100	2.01	0	99.99	0	0.00359
2	19.85	6.44	3.4944	99.99	0	0.0196
2	14.85	6.44	3.4944	99.99	0	0.0218
2	4.85	9.87	3.4944	99.99	0	0.029
2	9.85	9.87	3.4944	99.99	0	0.0258
2	9.85	6.44	3.4944	99.99	0	0.0236
2	14.85	9.87	3.4944	99.99	0	0.024
2	4.85	6.44	3.4944	99.99	0	0.0277
2	19.85	9.87	3.4944	99.99	0	0.0217
2	19.85	19.68	3.4944	99.99	0	0.0239
2	9.85	19.68	3.4944	99.99	0	0.0286
2	4.85	14.77	3.4944	99.99	0	0.0309
2	14.85	14.77	3.4944	99.99	0	0.0255
2	4.85	24.58	3.4944	99.99	0	0.0322
2	9.85	14.77	3.4944	99.99	0	0.0273
2	14.85	19.68	3.4944	99.99	0	0.0263
2	14.85	29.49	3.4944	99.99	0	0.0276
2	9.85	29.49	3.4944	99.99	0	0.0302
2	19.85	14.77	3.4944	99.99	0	0.0232
2	9.85	24.58	3.4944	99.99	0	0.0295
2	4.85	29.49	3.4944	99.99	0	0.0327
2	4.85	19.68	3.4944	99.99	0	0.0317
2	14.85	24.58	3.4944	99.99	0	0.0269
2	19.85	29.49	3.4944	99.99	0	0.0252
2	19.85	24.58	3.4944	99.99	0	0.0246
2	40	7.3779	18.0005	99.99	0	0.01029
2	40.16	1.1823	6.9379	99.99	0	0.00377
2	40.16	3.938	3.59361	99.99	0	0.01281
2	40.05	0.55887	0	99.99	0	0.00223
2	40.16	0.60662	15.7099	99.99	0	0.00186
2	40	0.81823	12.0647	99.99	0	0.00201
2	120.02	0.6199	0	99.99	0	0.00071
2	40	5.9779	18.0005	99.99	0	0.00898
2	40	4.6213	2.77458	99.99	0	0.01427
2	79.93	0.48739	15.7099	99.99	0	0.00075
2	80	0.22719	2.77458	99.99	0	0.00037
2	40.16	1.831	6.9379	99.99	0	0.00577
2	79.93	0.3033	6.9379	99.99	0	0.00056
2	40.05	0.71035	0	99.99	0	0.00284
2	79.93	10.508	15.7099	99.99	0	0.0135
2	40	1.244	12.0647	99.99	0	0.00304
2	40	0.37998	18.0005	99.99	0	0.00068
2	40.16	0.35577	22.7932	99.99	0	0.00076
2	40	4.0266	18.0005	99.99	0	0.00657
2	40	5.6247	2.77458	99.99	0	0.01659
2	40.16	5.314	3.59361	99.99	0	0.01639
2	79.93	8.2943	15.7099	99.99	0	0.01147
2	79.93	0.53094	22.9706	99.99	0	0.00062
2	40.05	0.88933	0	99.99	0	0.00354
2	40.16	0.82395	15.7099	99.99	0	0.00252
2	79.93	6.6006	15.7099	99.99	0	0.0096
2	40.16	3.9549	15.7099	99.99	0	0.01091
2	40	1.8608	12.0647	99.99	0	0.00446
2	40.16	3.5828	6.9379	99.99	0	0.01076
2	40	9.1289	12.0647	99.99	0	0.01517
2	79.93	5.1833	15.7099	99.99	0	0.00783
2	80	6.2413	19.2362	99.99	0	0.00561
2	79.93	1.9115	22.9706	99.99	0	0.00231
2	40.16	5.2677	15.7099	99.99	0	0.01371
2	40.16	8.9658	22.7932	99.99	0	0.0158
2	80	4.798	19.2362	99.99	0	0.00449
2	80	5.221	12.0647	99.99	0	0.0066
2	79.96	2.7289	0	99.99	0	0.00644
2	79.96	8.5503	0	99.99	0	0.01734
2	80	6.4697	12.0647	99.99	0	0.00789
2	79.93	3.5494	15.7099	99.99	0	0.00557
2	79.96	0.57858	0	99.99	0	0.00134
2	79.93	0.7043	15.7099	99.99	0	0.00111
2	79.93	1.5666	22.9706	99.99	0	0.00189
2	79.96	2.0436	0	99.99	0	0.00487
2	79.93	9.5268	22.9706	99.99	0	0.00931
2	79.96	4.939	0	99.99	0	0.01111
2	40.16	8.6961	6.9379	99.99	0	0.02031
2	79.96	6.6999	0	99.99	0	0.01437
2	40	0.56098	18.0005	99.99	0	0.00101
2	80	4.0823	12.0647	99.99	0	0.00532
2	80	7.6787	12.0647	99.99	0	0.00902
2	79.93	2.1905	15.7099	99.99	0	0.00352
2	80	3.8013	19.2362	99.99	0	0.00365
2	40.05	1.1248	0	99.99	0	0.00446
2	79.93	3.6421	22.9706	99.99	0	0.00425
2	79.96	1.4582	0	99.99	0	0.00349
2	40	6.7763	2.77458	99.99	0	0.01883
2	80	8.3541	19.2362	99.99	0	0.00703
2	80	0.45382	12.0647	99.99	0	0.00059
2	40	2.3353	18.0005	99.99	0	0.00403
2	40.16	1.665	15.7099	99.99	0	0.00499
2	40.16	7.2103	15.7099	99.99	0	0.01693
2	40	2.635	12.0647	99.99	0	0.00617
2	100.11	1.3692	0	99.99	0	0.00261
2	79.93	8.6383	22.9706	99.99	0	0.0087
2	40	7.7885	12.0647	99.99	0	0.01431
2	80	2.654	12.0647	99.99	0	0.00357
2	40.05	9.2319	0	99.99	0	0.02481
2	40.16	1.6387	22.7932	99.99	0	0.00357
2	100.11	0.79506	0	99.99	0	0.00144
2	79.93	1.1201	22.9706	99.99	0	0.00135
2	40.16	6.9878	22.7932	99.99	0	0.01388
2	120.02	0.84651	0	99.99	0	0.00118
2	80	0.54726	2.77458	99.99	0	0.00101
2	40.16	2.486	22.7932	99.99	0	0.0054
2	80	0.7644	12.0647	99.99	0	0.00101
2	79.93	0.42742	3.59361	99.99	0	0.00091
2	100.11	2.1336	0	99.99	0	0.00413
2	40.16	8.279	3.59361	99.99	0	0.02174
2	40.16	1.1986	22.7932	99.99	0	0.00261
2	40.16	8.3534	15.7099	99.99	0	0.0182
2	80	2.0042	12.0647	99.99	0	0.00272
2	100.11	9.2576	0	99.99	0	0.01599
2	40	0.83566	18.0005	99.99	0	0.00149
2	80	10.061	12.0647	99.99	0	0.01091
2	40.16	3.3726	22.7932	99.99	0	0.00727
2	79.93	0.57497	6.9379	99.99	0	0.00114
2	80	2.5587	19.2362	99.99	0	0.00253
2	79.93	1.916	3.59361	99.99	0	0.00419
2	79.93	5.2322	22.9706	99.99	0	0.00586
2	79.93	2.3568	3.59361	99.99	0	0.00514
2	79.93	9.4483	6.9379	99.99	0	0.0161
2	79.93	1.4235	3.59361	99.99	0	0.00312
2	40.16	6.6116	3.59361	99.99	0	0.01918
2	79.93	7.1322	22.9706	99.99	0	0.00755
2	40.16	5.6607	22.7932	99.99	0	0.01174
2	79.93	1.8353	6.9379	99.99	0	0.00376
2	79.93	9.9137	3.59361	99.99	0	0.01787
2	40.16	4.3001	22.7932	99.99	0	0.00917
2	79.93	2.8456	3.59361	99.99	0	0.00616
2	79.93	6.1674	22.9706	99.99	0	0.00672
2	120.02	6.3226	0	99.99	0	0.00927
2	80	1.2604	12.0647	99.99	0	0.00172
2	79.93	2.6731	6.9379	99.99	0	0.00542
2	40.16	1.0569	15.7099	99.99	0	0.00322
2	79.93	1.3799	6.9379	99.99	0	0.00283
2	79.93	1.2619	15.7099	99.99	0	0.00204
2	100.11	3.3171	0	99.99	0	0.00639
2	40	6.373	12.0647	99.99	0	0.01272
2	100.11	0.50979	0	99.99	0	0.00085
2	80	0.54588	19.2362	99.99	0	0.00053
2	100.11	8.1869	0	99.99	0	0.01449
2	40	1.25	18.0005	99.99	0	0.00222
2	80	5.6923	2.77458	99.99	0	0.0108
2	80	10.01	19.2362	99.99	0	0.00795
2	79.93	0.90081	15.7099	99.99	0	0.00144
2	79.93	8.1418	6.9379	99.99	0	0.01446
2	79.93	4.0172	3.59361	99.99	0	0.00851
2	40.16	9.7091	15.7099	99.99	0	0.01901
2	79.93	8.7473	3.59361	99.99	0	0.01636
2	40	3.8441	12.0647	99.99	0	0.00861
2	80	3.6332	2.77458	99.99	0	0.00706
2	40.16	0.62586	22.7932	99.99	0	0.00135
2	80	1.8656	19.2362	99.99	0	0.00186
2	40.16	0.85274	22.7932	99.99	0	0.00185
2	79.93	4.1286	6.9379	99.99	0	0.00814
2	80	10.1	2.77458	99.99	0	0.01751
2	40.05	6.6438	0	99.99	0	0.02123
2	80	0.87725	2.77458	99.99	0	0.00168
2	100.11	7.128	0	99.99	0	0.01291
2	40.05	4.6671	0	99.99	0	0.01639
2	100.11	4.4378	0	99.99	0	0.00843
2	79.96	0.9338	0	99.99	0	0.00222
2	40	8.4343	2.77458	99.99	0	0.02112
2	79.93	6.9073	6.9379	99.99	0	0.01271
2	80	2.6698	2.77458	99.99	0	0.00522
2	79.93	5.3136	3.59361	99.99	0	0.01093
2	79.93	5.633	6.9379	99.99	0	0.01072
2	40.16	5.9691	6.9379	99.99	0	0.01637
2	100.11	5.8847	0	99.99	0	0.01092
2	79.93	7.0646	3.59361	99.99	0	0.01388
2	79.93	0.94564	6.9379	99.99	0	0.00192
2	80	0.95025	19.2362	99.99	0	0.00094
2	80	1.3619	19.2362	99.99	0	0.00136
2	80	1.9589	2.77458	99.99	0	0.00383
2	80	1.4039	2.77458	99.99	0	0.00273
2	40	5.1372	12.0647	99.99	0	0.01089
2	80	8.3348	2.77458	99.99	0	0.01507
2	79.93	0.7882	22.9706	99.99	0	0.00094
2	80	9.2395	2.77458	99.99	0	0.01636
2	120.02	4.2303	0	99.99	0	0.0065
2	100.11	0.39475	0	99.99	0	0.00061
2	40.05	5.664	0	99.99	0	0.01902
2	40.05	1.8344	0	99.99	0	0.00713
2	120.02	1.5345	0	99.99	0	0.00229
2	80	9.49	1	99.99	0	0.0141
2	80.2	6.02	1	99.99	0	0.0101
2	200	4.12	1	99.99	0	0.0047
2	198.1	4.56	0	99.99	0	0.0057
2	120.1	2.13	0	99.99	0	0.0035
2	200.1	4.15	1	99.99	0	0.0047
2	199.9	8.12	1	99.99	0	0.0094
2	80.5	8.05	1	99.99	0	0.0134
2	199.9	6.01	1	99.99	0	0.0076
2	197.8	2.45	0	99.99	0	0.0022
2	80.3	8.04	1	99.99	0	0.0135
2	80.2	6.07	1	99.99	0	0.0108
2	80.1	9.94	1	99.99	0	0.0154
2	120.4	6.02	1	99.99	0	0.0097
2	80.3	4.04	1	99.99	0	0.0074
2	119.9	2.11	0	99.99	0	0.0034
2	120.1	6.04	1	99.99	0	0.0097
2	80.2	4.13	1	99.99	0	0.0076
2	120	2.11	1	99.99	0	0.0029
2	160.1	9.97	1	99.99	0	0.0136
2	119.9	4.09	0	99.99	0	0.0067
2	159.8	6.06	1	99.99	0	0.0087
2	160	8.03	1	99.99	0	0.0103
2	80.5	6.11	0	99.99	0	0.0112
2	200.5	9.93	1	99.99	0	0.0132
2	198.1	10.2	0	99.99	0	0.013
2	200	8.13	1	99.99	0	0.0098
2	120.1	4.05	0	99.99	0	0.0065
2	160.2	2.15	1	99.99	0	0.0028
2	120.1	4.04	1	99.99	0	0.0059
2	160	3.94	0	99.99	0	0.0056
2	80.5	7.76	0	99.99	0	0.0137
2	198	10.21	0	99.99	0	0.014
2	80.5	7.84	0	99.99	0	0.0138
2	80.6	4.34	0	99.99	0	0.0084
2	159.7	5.94	0	99.99	0	0.008
2	197.6	8.02	0	99.99	0	0.0109
2	120	6.05	0	99.99	0	0.0091
2	120.3	9.98	0	99.99	0	0.0145
2	159.9	9.93	1	99.99	0	0.0131
2	159.9	6.04	1	99.99	0	0.0084
2	80.5	2.33	0	99.99	0	0.0047
2	119.9	8.11	0	99.99	0	0.0119
2	160	4.1	1	99.99	0	0.0054
2	120.1	8.16	0	99.99	0	0.012
2	199.8	6.01	1	99.99	0	0.0069
2	159.9	2.06	0	99.99	0	0.0029
2	80.2	4.31	0	99.99	0	0.0085
2	120	5.96	0	99.99	0	0.0091
2	80.3	10.16	0	99.99	0	0.0164
2	119.9	8.16	1	99.99	0	0.0118
2	198	7.97	0	99.99	0	0.0106
2	120.1	8.15	1	99.99	0	0.012
2	159.9	7.95	1	99.99	0	0.0106
2	198	4.6	0	99.99	0	0.0052
2	160.1	4.12	1	99.99	0	0.0055
2	120	9.97	1	99.99	0	0.0139
2	120.1	9.96	0	99.99	0	0.0142
2	120.2	10.03	1	99.99	0	0.0138
2	120.1	2.14	1	99.99	0	0.0031
2	159.7	2.04	0	99.99	0	0.0029
2	120.1	4.06	1	99.99	0	0.0061
2	159.9	3.91	0	99.99	0	0.0054
2	79.7	10.18	0	99.99	0	0.0166
2	159.8	8.07	0	99.99	0	0.011
2	159.8	8.06	0	99.99	0	0.011
2	197.7	6.24	0	99.99	0	0.0078

## Sheet: Sheet2
idx	T	P	I	C1	C2	C3	C4	Solubility
1	4.65	4.36	0	99.99	0	0	0	0.000436
2	125	20.804	18.947	99.95	99.95	0	0	0.000825
1	11.93	6.22	0	76.77	15.51	7.72	0	0.00165
1	39.95	20.27	0	99.99	0	0	0	0.002449
3	95.01	3.915	0	0	0	99.99	0	0.0002601
1	12.07	12.04	0	76.77	15.51	7.72	0	0.00189
1	40.05	0.81433	17.4608	99.99	0	0	0	9e-05
1	80	9.9646	7.91698	99.99	0	0	0	0.00125
1	71	20	0	83	0	0	17	0.001886
1	5.07	20	0	76.77	15.51	7.72	0	0.00114
1	80	8.4272	30.2337	99.99	0	0	0	0.0008
1	125	10.504	5.52133	99.95	0	0	0	0.001058
1	71.1111	4.65952	0	71	29	0	0	0.000875
2	10.01	1.038	0	94	4	0	2	1.65e-05
1	14	20	1.83	75.31	16.16	8.53	0	0.00171
3	104.444	35.1391	0	61.1	17.78	21.1	0	0.000123
1	104.444	21.1255	0	82.18	9.45	8.37	0	0.002668
1	71.1111	34.7888	0	85.36	14.64	0	0	0.002554
1	25	4.21178	5.52133	99.99	0	0	0	0.00058
1	2.05	1.8	0	90.13	9.87	0	0	0.001032
2	104.444	14.1187	0	0	40.59	59.41	0	0.000447
1	80.08	4.3879	37.3512	99.99	0	0	0	0.00047
2	71.1111	14.469	0	85.36	14.64	0	0	0.000445
2	104.444	34.7888	0	0	22.14	77.86	0	0.000336
1	50	5.39475	12.7476	99.99	0	0	0	0.00044
3	14	20	0.32	75.31	16.16	8.53	0	1.4e-05
1	39.96	17.998	0	99.99	0	0	0	0.002325
1	100.02	0.80639	7.00242	99.99	0	0	0	0.0001
1	75	5.11941	23.9877	99.99	0	0	0	0.000189
3	104.444	14.469	0	20.4	0	79.6	0	0.001327
3	104.444	14.469	0	86.45	0	13.55	0	0.000249
1	71.1111	14.469	0	85.36	14.64	0	0	0.001605
2	16.71	20	0	76.77	15.51	7.72	0	9e-05
1	125	22.5682	12.7476	99.99	0	0	0	0.00104
1	100.06	9.6654	15.6568	99.99	0	0	0	0.00116
1	104.444	35.1391	0	82.18	9.45	8.37	0	0.003276
1	100.02	3.1255	7.00242	99.99	0	0	0	0.00043
1	25	20.6204	0	99.99	0	0	0	0.00229
1	40.02	0.79551	15.6568	99.99	0	0	0	0.00014
2	16	14.14	0	76.77	15.51	7.72	0	0.000108
1	40.05	8.1028	9.54819	99.99	0	0	0	0.00103
3	12.05	10.49	0	76.77	15.51	7.72	0	1.5e-05
2	37.7778	5.37422	0	0	99.99	0	0	0.000709
2	137.778	25.1194	0	0	99.99	0	0	0.00153
1	71	20	0	99.99	0.01	0	0	0.002183
1	14	20	0.52	75.31	16.16	8.53	0	0.00169
2	24.02	20	0	76.77	15.51	7.72	0	0.000249
3	104.444	35.1391	0	50.15	0	49.85	0	0.00112
2	37.7778	53.2867	0	0	99.99	0	0	0.00106
1	125	11.8603	12.7476	99.99	0	0	0	0.00069
1	9.88	20	0	76.77	15.51	7.72	0	0.00178
1	71.1111	21.4759	0	19.96	80.04	0	0	0.000954
3	104.444	14.469	0	50.23	25.27	24.5	0	3.2e-05
1	71.1111	14.469	0	49.9	50.1	0	0	0.001455
1	25	11.8603	12.7476	99.99	0	0	0	0.00091
1	25	5.37436	13.6284	99.99	0	0	0	0.00047
1	104.444	35.034	0	70.15	10.65	19.2	0	0.003158
2	25.98	20	0	76.77	15.51	7.72	0	0.000231
2	10.05	1	0	90.13	9.87	0	0	0.0001475
1	71	100	0	23	0	0	77	0.001148
2	71.1111	34.7888	0	49.9	50.1	0	0	0.001508
1	39.95	30.4	0	99.99	0	0	0	0.003099
2	37.7778	13.4881	0	0	99.99	0	0	0.000821
1	1.4	20	0	76.77	15.51	7.72	0	0.00106
1	25	14.6546	16.7561	99.99	0	0	0	0.00114
1	16.06	20.1	0	76.77	15.51	7.72	0	0.00213
1	150	18.3768	12.7476	99.99	0	0	0	0.00088
1	75	22.558	12.7476	99.99	0	0	0	0.00118
1	14.07	15.99	0	76.77	15.51	7.72	0	0.00191
1	102.5	20.498	0	99.95	0	0	0	0.002205
3	104.444	34.7888	0	0	40.59	59.41	0	0.000579
1	125	5.70069	12.7476	99.99	0	0	0	0.00036
1	19.55	25.2	0	99.99	0	0	0	0.00252
1	25	15.4602	21.7413	99.99	0	0	0	0.00093
1	50	20.9569	0	99.99	0	0	0	0.00207
1	80	1.8129	7.91698	99.99	0	0	0	0.00025
1	79.95	40.53	0	99.99	0	0	0	0.003188
1	25	20.7428	18.947	99.99	0	0	0	0.0007
2	104.444	28.1323	0	61.1	17.78	21.1	0	0.000613
3	14.07	15.99	0	76.77	15.51	7.72	0	1e-05
1	1.96	2.82	0	99.99	0	0	0	0.001061
1	80.14	1.0004	22.9263	99.99	0	0	0	0.00012
2	14	20	2.88	75.31	16.16	8.53	0	0.000147
1	71	5	0	23	0	0	77	0.000584
1	80.14	4.5286	6.87329	99.99	0	0	0	0.00063
1	40.2	7.8213	0	99.99	0	0	0	0.00145
3	4.93	8.23	0	76.77	15.51	7.72	0	7e-06
1	125	20.804	0	99.95	0	0	0	0.002321
1	40.02	6.7842	30.2759	99.99	0	0	0	0.00081
1	22.95	20	0	76.77	15.51	7.72	0	0.00244
1	100	11.6563	12.7476	99.99	0	0	0	0.00074
2	104.444	4.65952	0	61.1	17.78	21.1	0	0.000271
1	80	1.3407	17.6621	99.99	0	0	0	0.00018
2	20.05	0.5	0	0	99.99	0	0	0.000245
1	20.05	3	0	99.99	0	0	0	0.000755
2	20.92	20	0	76.77	15.51	7.72	0	0.000147
2	71	20	0	0.01	99	0	0	0.000926
1	57.95	25.33	0	99.99	0	0	0	0.002513
3	6.99	0.504	0	0	0	99.99	0	0.0002461
1	50	14.3486	23.9877	99.99	0	0	0	0.000461
1	100.06	4.3686	22.9263	99.99	0	0	0	0.00052
2	137.778	6.85966	0	0	99.99	0	0	0.000803
1	40.2	6.6463	0	99.99	0	0	0	0.00126
1	100.06	8.9677	22.9263	99.99	0	0	0	0.00102
3	12.1	16.13	0	76.77	15.51	7.72	0	1.8e-05
2	24.99	2.964	0	94	4	0	2	3.3e-05
1	25	17.765	0	99.99	0	0	0	0.0021
4	24.99	7.257	0	94	4	0	2	9.91e-06
1	71.1111	21.4759	0	49.9	50.1	0	0	0.0018
1	40.02	2.8283	7.99056	99.99	0	0	0	0.00048
2	87.7778	35.034	0	70.15	10.65	19.2	0	0.000329
2	104.444	14.1187	0	0	70.05	29.95	0	0.000595
1	71.1111	35.034	0	49.9	50.1	0	0	0.00208
3	6.99	0.395	0	0	0	99.99	0	0.0002027
1	9.85	5.3	0	99.99	0	0	0	0.00053
2	71	50	0	28.3	71.7	0	0	0.000821
1	71	100	0	99.99	0.01	0	0	0.005085
1	102.5	51.296	0	99.95	0	0	0	0.00385
1	60.55	1.327	0	99.99	0	0	0	0.0002124
3	11.99	8.23	0	76.77	15.51	7.72	0	9e-06
1	100	11.3708	0	99.99	0	0	0	0.00127
3	104.444	35.1391	0	82.18	9.45	8.37	0	9.9e-05
1	102.5	30.798	18.947	99.95	0	0	0	0.001079
1	50	17.765	0	99.99	0	0	0	0.0019
1	25	8.84168	12.7476	99.99	0	0	0	0.00072
1	75	8.35218	23.9877	99.99	0	0	0	0.000281
1	5	2.004	0	94	4	0	2	0.000646
2	137.778	45.299	0	0	99.99	0	0	0.001867
1	125	21.3649	0	99.99	0	0	0	0.00179
4	5	2.004	0	94	4	0	2	1.121e-05
1	10.05	1	0	90.13	9.87	0	0	0.000643
2	30.05	1	0	0	99.99	0	0	0.000366
2	12.24	20.1	0	76.77	15.51	7.72	0	6e-05
1	100	14.9299	0	99.99	0	0	0	0.00152
2	104.444	21.1255	0	70.15	10.65	19.2	0	0.000304
4	4.99	1.032	0	94	4	0	2	7.03e-06
2	71	75	0	28.3	71.7	0	0	0.000944
3	5.12	19.9	0	76.77	15.51	7.72	0	1.1e-05
2	24.99	0.994	0	94	4	0	2	1.47e-05
4	71	75	0	45.5	0	0	54.5	4.8e-05
3	14.98	0.697	0	0	0	99.99	0	0.0002347
1	40.02	1.4954	37.3512	99.99	0	0	0	0.00021
1	104.444	21.1255	0	20.4	0	79.6	0	0.001449
3	104.444	21.1255	0	50.15	0	49.85	0	0.00097
2	71.1111	5.50034	0	0	99.99	0	0	0.00057
3	14	20	0.045	75.31	16.16	8.53	0	1.4e-05
2	171.111	35.2793	0	0	99.99	0	0	0.002515
2	71.1111	8.51327	0	0	99.99	0	0	0.000679
1	40.36	9.1803	6.87329	99.99	0	0	0	0.00152
3	95.01	3.503	0	0	0	99.99	0	0.0002482
1	100.06	1.7983	15.6568	99.99	0	0	0	0.00023
1	19.95	10.13	0	99.99	0	0	0	0.001951
1	80.06	4.7841	9.58286	99.99	0	0	0	0.00057
4	71	5	0	23	0	0	77	5.6e-05
1	25	4.88485	16.7561	99.99	0	0	0	0.00044
3	104.444	5.00986	0	72.8	0	27.2	0	0.000425
1	40.02	1.6164	15.6568	99.99	0	0	0	0.00028
1	9.75	18.3	0	99.99	0	0	0	0.00183
1	71	50	0	72.5	27.5	0	0	0.002801
1	71	10	0	45.5	0	0	54.5	0.00115
2	12.1	16.13	0	76.77	15.51	7.72	0	8.1e-05
2	20.05	2.5	0	0	99.99	0	0	0.000811
1	40.2	1.3074	0	99.99	0	0	0	0.00028
3	65	1.302	0	0	0	99.99	0	0.000137
1	80.03	6.9269	0	99.99	0	0	0	0.00098
3	104.444	56.1595	0	50.15	0	49.85	0	0.001242
3	20	20	0	76.77	15.51	7.72	0	1.5e-05
1	100	17.8363	12.7476	99.99	0	0	0	0.00099
1	40	6.0552	22.9263	99.99	0	0	0	0.00089
1	80	10.232	17.6621	99.99	0	0	0	0.00116
3	104.444	4.65952	0	70.15	10.65	19.2	0	8.3e-05
3	5.07	20	0	76.77	15.51	7.72	0	1.1e-05
1	9.75	26.4	0	99.99	0	0	0	0.00264
1	150	11.1566	0	99.99	0	0	0	0.00119
1	125	18.2239	0	99.99	0	0	0	0.00166
1	40	8.7352	22.9263	99.99	0	0	0	0.00121
1	40.02	1.5825	7.99056	99.99	0	0	0	0.00028
1	80.06	0.8728	9.58286	99.99	0	0	0	0.00011
3	49.98	1.156	0	0	0	99.99	0	0.0001485
1	39.95	5.07	0	99.99	0	0	0	0.000883
1	80.06	1.5788	17.0545	99.99	0	0	0	0.00015
1	104.444	21.1255	0	72.8	0	27.2	0	0.002196
3	104.444	35.1391	0	86.45	0	13.55	0	0.000384
1	25	10.6467	13.6284	99.99	0	0	0	0.00077
3	104.444	14.469	0	70.15	10.65	19.2	0	0.000161
1	25	15.8171	23.056	99.99	0	0	0	0.00069
1	80.06	3.2509	9.58286	99.99	0	0	0	0.00039
2	12.01	9.22	0	76.77	15.51	7.72	0	7.9e-05
3	49.98	0.65	0	0	0	99.99	0	8.97e-05
3	95.01	0.41	0	0	0	99.99	0	3.21e-05
1	80	7.8816	30.2337	99.99	0	0	0	0.00075
2	137.778	1.47143	0	0	99.99	0	0	0.000158
2	171.111	46.4551	0	0	99.99	0	0	0.00279
2	104.444	21.1255	0	61.1	17.78	21.1	0	0.000546
2	14	20	0.82	75.31	16.16	8.53	0	0.000102
1	19.55	9.08	0	99.99	0	0	0	0.000908
2	4.99	1.032	0	94	4	0	2	1.99e-05
3	80.03	1.431	0	0	0	99.99	0	0.0001317
3	34.98	0.61	0	0	0	99.99	0	0.0001158
3	5.11	19.65	0	76.77	15.51	7.72	0	1.3e-05
1	50	11.8695	12.7476	99.99	0	0	0	0.00085
2	71.1111	2.20714	0	0	99.99	0	0	0.000309
1	39.96	7.798	0	99.99	0	0	0	0.001305
2	39.97	12.624	0	94	4	0	2	5.86e-05
1	104.444	14.469	0	70.15	10.65	19.2	0	0.002234
1	5.12	19.9	0	76.77	15.51	7.72	0	0.00114
1	100.06	8.6176	15.6568	99.99	0	0	0	0.00105
2	30.05	3.5	0	0	99.99	0	0	0.000804
2	17.8	20	0	76.77	15.51	7.72	0	0.000122
1	9.93	1.24	0	99.99	0	0	0	0.00124
1	14.55	9.33	0	99.99	0	0	0	0.000933
1	80.06	0.513	9.58286	99.99	0	0	0	6e-05
1	25	5.33356	12.7476	99.99	0	0	0	0.00049
1	100.06	7.4339	22.9263	99.99	0	0	0	0.00086
1	19.86	1.17	0	99.99	0	0	0	0.00117
1	20.05	6	0	99.99	0	0	0	0.001526
2	104.444	13.7684	0	0	99.99	0	0	0.000944
1	100.02	1.2889	7.00242	99.99	0	0	0	0.00017
2	137.778	56.4398	0	0	99.99	0	0	0.001901
1	100.14	1.1371	0	99.99	0	0	0	0.00016
1	25	11.1872	23.9877	99.99	0	0	0	0.00041
3	24.97	0.401	0	0	0	99.99	0	0.0001037
1	24.99	7.257	0	94	4	0	2	0.001359
1	39.97	12.624	0	94	4	0	2	0.001817
1	80.08	0.84223	37.3512	99.99	0	0	0	9e-05
1	25	17.8159	5.52133	99.99	0	0	0	0.00162
1	24.35	14.4	0	99.99	0	0	0	0.00144
1	9.99	3.413	0	94	4	0	2	0.000891
2	104.444	56.1595	0	0	81.51	18.49	0	0.000926
1	104.444	56.1595	0	50.15	0	49.85	0	0.002928
1	104.444	5.00986	0	39.67	0	60.33	0	0.00146
3	104.444	28.1323	0	25.94	35.58	38.48	0	0.000461
1	25	8.17881	0	99.99	0	0	0	0.00128
1	14.9	20	0	76.77	15.51	7.72	0	0.00225
2	71.1111	34.2282	0	0	99.99	0	0	0.001011
1	80	4.8577	7.91698	99.99	0	0	0	0.00065
2	104.444	34.7888	0	0	81.51	18.49	0	0.000812
2	54.4444	35.034	0	49.9	50.1	0	0	0.001561
1	19.95	5.07	0	99.99	0	0	0	0.001204
1	5.06	12.22	0	76.77	15.51	7.72	0	0.00117
1	79.95	2.53	0	99.99	0	0	0	0.000361
1	51.5	30.5941	5.52133	99.95	0	0	0	0.002138
2	14.05	11.73	0	76.77	15.51	7.72	0	0.000119
1	80.08	5.852	37.3512	99.99	0	0	0	0.00061
1	71	10	0	23	0	0	77	0.00063
3	5.14	20	0	76.77	15.51	7.72	0	1e-05
1	80	4.8943	30.2337	99.99	0	0	0	0.00049
1	104.444	56.1595	0	72.8	0	27.2	0	0.003184
1	75	14.9095	0	99.99	0	0	0	0.00157
1	51.5	40.7921	5.52133	99.95	0	0	0	0.0025
2	71.1111	4.65952	0	71	29	0	0	0.000452
1	40.02	0.38992	7.99056	99.99	0	0	0	7e-05
1	51.5	50.9901	18.947	99.95	0	0	0	0.001303
1	71.1111	14.469	0	19.96	80.04	0	0	0.000798
1	80.14	7.8442	15.7099	99.99	0	0	0	0.00095
3	16.05	20.1	0	76.77	15.51	7.72	0	9e-06
2	71.1111	67.6156	0	0	99.99	0	0	0.001166
2	104.444	3.83973	0	0	99.99	0	0	0.000391
1	12.1	20	0	76.77	15.51	7.72	0	0.00176
1	50	22.5478	12.7476	99.99	0	0	0	0.00126
1	19.55	9.26	0	99.99	0	0	0	0.000926
1	80	0.51073	30.2337	99.99	0	0	0	5e-05
1	102.5	41.098	5.52133	99.95	0	0	0	0.00257
2	20.05	1.5	0	0	99.99	0	0	0.000651
3	80.03	2.061	0	0	0	99.99	0	0.0001745
3	34.98	0.399	0	0	0	99.99	0	7.7e-05
1	40.36	0.90499	6.87329	99.99	0	0	0	0.00018
3	4.94	0.398	0	0	0	99.99	0	0.0002208
4	9.99	0.987	0	94	4	0	2	5.12e-06
1	150	4.98683	23.9877	99.99	0	0	0	0.000173
2	16.06	20.1	0	76.77	15.51	7.72	0	9.4e-05
1	100.06	1.2573	22.9263	99.99	0	0	0	0.00015
1	125	14.8483	12.7476	99.99	0	0	0	0.00083
2	104.444	35.1391	0	82.18	9.45	8.37	0	0.000317
3	19.98	0.599	0	0	0	99.99	0	0.0001756
4	71	100	0	4.3	0	0	95.7	9e-05
1	104.444	4.65952	0	50.23	25.27	24.5	0	0.001178
1	71.1111	14.469	0	71	29	0	0	0.001598
1	40.05	6.6193	25.3022	99.99	0	0	0	0.00054
3	14.98	0.488	0	0	0	99.99	0	0.0001733
1	25	15.297	28.8106	99.99	0	0	0	0.00122
1	40.36	1.2202	6.87329	99.99	0	0	0	0.00024
2	71.1111	34.7888	0	85.36	14.64	0	0	0.000706
3	6.99	0.447	0	0	0	99.99	0	0.0002245
1	40.05	2.5029	9.54819	99.99	0	0	0	0.00036
1	40.36	5.7921	6.87329	99.99	0	0	0	0.00102
2	71.1111	4.65952	0	85.36	14.64	0	0	0.000232
1	71.1111	34.7888	0	49.9	50.1	0	0	0.002081
1	80	3.8382	30.2337	99.99	0	0	0	0.00039
1	40.2	0.43297	0	99.99	0	0	0	9e-05
3	104.444	14.1187	0	0	22.14	77.86	0	0.00051
1	4.99	1.032	0	94	4	0	2	0.000339
1	100.14	1.7934	0	99.99	0	0	0	0.00026
1	104.444	35.034	0	49.9	50.1	0	0	0.002432
3	104.444	21.1255	0	0	56.4	43.6	0	0.000541
2	104.444	0.861837	0	0	99.99	0	0	6.98e-05
2	71.1111	55.4588	0	85.36	14.64	0	0	0.000934
2	10.05	2	0	90.13	9.87	0	0	0.0001451
2	14	20	0.32	75.31	16.16	8.53	0	0.000118
1	25	4.79307	23.9877	99.99	0	0	0	0.00021
1	80.14	9.2417	22.9263	99.99	0	0	0	0.00101
1	104.444	14.469	0	39.67	0	60.33	0	0.001925
1	104.444	35.1391	0	86.45	0	13.55	0	0.002912
1	125	62.004	0	99.95	0	0	0	0.0043
3	104.444	21.1255	0	0	40.59	59.41	0	0.000539
1	100.14	6.6953	0	99.99	0	0	0	0.00093
2	104.444	34.7888	0	0	56.4	43.6	0	0.000582
1	80.14	0.69676	22.9263	99.99	0	0	0	8e-05
1	80.14	3.2455	6.87329	99.99	0	0	0	0.00046
2	12.05	10.49	0	76.77	15.51	7.72	0	8.9e-05
4	71	10	0	45.5	0	0	54.5	3.4e-05
1	40.05	1.4448	17.4608	99.99	0	0	0	0.00017
2	71.1111	34.7888	0	40.5	59.5	0	0	0.001624
3	5.07	16.12	0	76.77	15.51	7.72	0	1e-05
2	171.111	36.7857	0	0	99.99	0	0	0.002635
1	104.444	14.469	0	50.23	25.27	24.5	0	0.002068
2	37.7778	7.56735	0	0	99.99	0	0	0.000801
3	65	0.997	0	0	0	99.99	0	0.0001094
1	40.36	6.5309	6.87329	99.99	0	0	0	0.00114
1	25	5.31317	21.7413	99.99	0	0	0	0.00038
3	104.444	5.00986	0	86.45	0	13.55	0	0.00015
1	71	50	0	99.99	0	0	0.01	0.003723
3	14	20	1.83	75.31	16.16	8.53	0	3.4e-05
1	102.5	41.098	18.947	99.95	0	0	0	0.001211
1	150	11.5748	23.9877	99.99	0	0	0	0.000337
2	104.444	14.469	0	61.1	17.78	21.1	0	0.000476
1	40.02	2.9931	15.6568	99.99	0	0	0	0.0005
2	71	100	0	28.3	71.7	0	0	0.001024
1	104.444	14.469	0	72.8	0	27.2	0	0.001895
1	80.14	8.9197	15.7099	99.99	0	0	0	0.00107
1	9.98	1.039	0	99.99	0	0	0	0.000329
1	25	20.6204	28.8106	99.99	0	0	0	0.00152
2	104.444	21.1255	0	0	40.59	59.41	0	0.000481
4	71	20	0	23	0	0	77	5.6e-05
1	71	20	0	45.5	0	0	54.5	0.001441
4	10	2.077	0	94	4	0	2	9.41e-06
1	40.02	2.9247	22.9996	99.99	0	0	0	0.00051
1	14	20	0.045	75.31	16.16	8.53	0	0.00161
1	4.65	8.3	0	99.99	0	0	0	0.00083
1	80.08	0.30398	23.4207	99.99	0	0	0	4e-05
1	40.02	5.2967	37.3512	99.99	0	0	0	0.00069
1	80.08	2.9452	23.4207	99.99	0	0	0	0.0004
2	71.1111	13.9085	0	0	99.99	0	0	0.000788
1	80.14	2.0481	6.87329	99.99	0	0	0	0.00029
1	40.02	0.33581	17.8383	99.99	0	0	0	0.00089
1	9.98	2.756	0	99.99	0	0	0	0.000772
1	150	22.5886	12.7476	99.99	0	0	0	0.00099
4	9.99	3.413	0	94	4	0	2	1.121e-05
1	71.1111	55.4588	0	40.5	59.5	0	0	0.002648
1	150	5.73129	12.7476	99.99	0	0	0	0.00033
1	115.25	2.156	0	99.99	0	0	0	0.0003085
1	75	11.8501	12.7476	99.99	0	0	0	0.00078
2	137.778	2.24218	0	0	99.99	0	0	0.000272
1	25	19.6924	13.6284	99.99	0	0	0	0.00112
2	104.444	35.1391	0	25.94	35.58	38.48	0	0.001396
1	75	18.3156	12.7476	99.99	0	0	0	0.00105
3	24.97	0.92	0	0	0	99.99	0	0.0002144
2	9.99	3.413	0	94	4	0	2	4.28e-05
1	71.1111	21.4759	0	71	29	0	0	0.001848
3	104.444	4.65952	0	61.1	17.78	21.1	0	4.6e-05
1	75	17.6324	23.9877	99.99	0	0	0	0.00051
1	75	11.5238	0	99.99	0	0	0	0.00133
3	4.94	0.445	0	0	0	99.99	0	0.0002439
1	125	51.704	5.52133	99.95	0	0	0	0.00294
1	50	18.1015	23.9877	99.99	0	0	0	0.000536
4	71	100	0	45.5	0	0	54.5	5.2e-05
2	71.1111	14.469	0	40.5	59.5	0	0	0.001128
1	104.444	14.469	0	82.18	9.45	8.37	0	0.002
1	100.02	0.93372	7.00242	99.99	0	0	0	0.00012
1	51.5	20.396	0	99.95	0	0	0	0.002279
2	71.1111	35.034	0	49.9	50.1	0	0	0.001506
2	12.07	12.04	0	76.77	15.51	7.72	0	7.3e-05
1	25	45.8911	12.7476	99.99	0	0	0	0.00167
1	40.36	7.7034	6.87329	99.99	0	0	0	0.00131
1	71	75	0	48.2	51.8	0	0	0.002229
3	104.444	28.1323	0	82.18	9.45	8.37	0	8.7e-05
1	125	10.504	0	99.95	0	0	0	0.001434
1	125	8.29099	23.9877	99.99	0	0	0	0.000262
1	75	14.6851	12.7476	99.99	0	0	0	0.0009
2	125	51.704	18.947	99.95	99.95	0	0	0.001322
3	17.8	20	0	76.77	15.51	7.72	0	2.2e-05
1	102.5	10.3	0	99.95	0	0	0	0.001355
2	11.93	6.22	0	76.77	15.51	7.72	0	7.8e-05
1	80.06	0.34228	17.0545	99.99	0	0	0	3e-05
1	100	18.1627	0	99.99	0	0	0	0.00171
1	25	9.89208	16.7561	99.99	0	0	0	0.0008
2	104.444	28.1323	0	82.18	9.45	8.37	0	0.000275
3	104.444	14.469	0	82.18	9.45	8.37	0	5.6e-05
1	9.98	5.977	0	99.99	0	0	0	0.001496
2	104.444	14.469	0	82.18	9.45	8.37	0	0.000194
1	50	4.99703	0	99.99	0	0	0	0.00072
1	50	14.3588	12.7476	99.99	0	0	0	0.00095
2	10.05	1	0	0	99.99	0	0	0.000538
1	40.05	1.022	17.4608	99.99	0	0	0	0.00012
1	100	4.93584	0	99.99	0	0	0	0.00066
4	10	3.415	0	94	4	0	2	1.048e-05
1	25.01	0.977	0	99.99	0	0	0	0.000238
1	9.83	1.14	0	99.99	0	0	0	0.00114
1	100.06	0.97113	22.9263	99.99	0	0	0	0.00011
2	5	2.004	0	94	4	0	2	3.87e-05
1	40.2	1.5177	0	99.99	0	0	0	0.00032
1	51.5	50.9901	0	99.95	0	0	0	0.00373
2	104.444	4.65952	0	70.15	10.65	19.2	0	0.000137
2	14	20	0.52	75.31	16.16	8.53	0	9.6e-05
2	137.778	35.3493	0	0	99.99	0	0	0.001703
2	104.444	56.1595	0	0	22.14	77.86	0	0.000365
1	100	8.57653	12.7476	99.99	0	0	0	0.00055
1	16	14.14	0	76.77	15.51	7.72	0	0.0023
1	25.01	2.542	0	99.99	0	0	0	0.000613
1	22.13	20	0	76.77	15.51	7.72	0	0.00282
1	24.99	11.749	0	94	4	0	2	0.002014
1	4.93	8.23	0	76.77	15.51	7.72	0	0.00109
1	104.444	21.1255	0	86.45	0	13.55	0	0.00225
1	104.444	4.65952	0	82.18	9.45	8.37	0	0.00123
1	75	5.62931	12.7476	99.99	0	0	0	0.00039
1	80.14	1.18	15.7099	99.99	0	0	0	0.00015
3	21.99	20	0	76.77	15.51	7.72	0	1.4e-05
1	71	100	0	45.5	0	0	54.5	0.002329
1	71	50	0	99.99	0.01	0	0	0.003723
1	25	4.6299	0	99.99	0	0	0	0.0009
2	2.05	1.8	0	90.13	9.87	0	0	9.86e-05
3	80.03	3.082	0	0	0	99.99	0	0.000227
1	19.95	25.33	0	99.99	0	0	0	0.003372
2	21.99	20	0	76.77	15.51	7.72	0	0.000172
1	40.2	1.0979	0	99.99	0	0	0	0.00023
4	71	20	0	45.5	0	0	54.5	3.7e-05
2	14.9	20	0	76.77	15.51	7.72	0	6.7e-05
1	104.444	14.469	0	20.4	0	79.6	0	0.001274
1	14.08	16.08	0	76.77	15.51	7.72	0	0.00189
2	104.444	35.034	0	49.9	50.1	0	0	0.001768
3	104.444	35.1391	0	25.94	35.58	38.48	0	0.000607
1	40	6.8173	22.9263	99.99	0	0	0	0.00098
2	11.99	8.23	0	76.77	15.51	7.72	0	8.4e-05
3	49.98	1.396	0	0	0	99.99	0	0.0001728
2	171.111	25.5048	0	0	99.99	0	0	0.002325
1	125	41.302	0	99.95	0	0	0	0.00343
2	171.111	30.0241	0	0	99.99	0	0	0.00248
1	40.02	0.61936	7.99056	99.99	0	0	0	0.00011
3	104.444	14.469	0	25.94	35.58	38.48	0	0.000351
1	40.02	0.87853	30.2759	99.99	0	0	0	0.00012
1	80	6.5295	30.2337	99.99	0	0	0	0.00064
4	71	75	0	4.3	0	0	95.7	7e-05
3	104.444	21.1255	0	50.23	25.27	24.5	0	4.1e-05
1	102.5	20.498	18.947	99.95	0	0	0	0.000826
3	19.98	0.699	0	0	0	99.99	0	0.0002023
3	104.444	34.7888	0	0	56.4	43.6	0	0.000584
1	57.95	5.07	0	99.99	0	0	0	0.000747
2	71.1111	14.469	0	71	29	0	0	0.000822
1	57.95	15.2	0	99.99	0	0	0	0.001815
1	102.5	61.596	18.947	99.95	0	0	0	0.001433
1	125	11.3708	0	99.99	0	0	0	0.00124
3	104.444	28.1323	0	70.15	10.65	19.2	0	0.000205
1	25	20.1921	16.7561	99.99	0	0	0	0.00139
1	5.11	19.65	0	76.77	15.51	7.72	0	0.00119
1	79.95	25.33	0	99.99	0	0	0	0.002401
1	104.444	14.469	0	25.94	35.58	38.48	0	0.001305
1	39.97	7.46	0	94	4	0	2	0.001157
1	71.1111	4.65952	0	85.36	14.64	0	0	0.00084
2	87.7778	35.034	0	49.9	50.1	0	0	0.00159
1	150	20.7428	0	99.99	0	0	0	0.00173
1	80.03	0.95284	0	99.99	0	0	0	0.00014
1	71	75	0	72.5	27.5	0	0	0.00347
3	14	20	0.21	75.31	16.16	8.53	0	1.3e-05
1	71	100	0	4.3	0	0	95.7	0.000286
1	4.65	3.21	0	99.99	0	0	0	0.000321
1	10.01	1.038	0	94	4	0	2	0.0003
4	10	3.079	0	94	4	0	2	1.063e-05
1	71	75	0	45.5	0	0	54.5	0.002118
1	125	5.07861	23.9877	99.99	0	0	0	0.000177
3	104.444	14.469	0	72.8	0	27.2	0	0.000605
1	40.2	4.3071	0	99.99	0	0	0	0.00086
2	104.444	2.25619	0	0	99.99	0	0	0.000256
1	1.96	1.565	0	99.99	0	0	0	0.000631
4	10.01	1.038	0	94	4	0	2	4.82e-06
3	12.01	9.22	0	76.77	15.51	7.72	0	1.1e-05
2	104.444	14.1187	0	0	56.4	43.6	0	0.000509
3	104.444	14.1187	0	0	56.4	43.6	0	0.000505
2	71.1111	58.3667	0	0	99.99	0	0	0.001178
1	40.05	5.3926	9.54819	99.99	0	0	0	0.00073
1	100.06	0.55971	15.6568	99.99	0	0	0	6e-05
2	37.7778	3.97986	0	0	99.99	0	0	0.000647
4	71	2.5	0	23	0	0	77	5e-05
1	104.444	35.1391	0	72.8	0	27.2	0	0.00269
2	15.01	1.038	0	94	4	0	2	1.72e-05
3	14.08	16.08	0	76.77	15.51	7.72	0	1.1e-05
1	51.5	40.7921	0	99.95	0	0	0	0.00334
1	71	20	0	4.3	0	0	95.7	0.000127
2	71.1111	1.37333	0	0	99.99	0	0	0.000154
3	22.95	20	0	76.77	15.51	7.72	0	3.8e-05
1	102.5	61.596	0	99.95	0	0	0	0.00419
2	37.7778	35.034	0	49.9	50.1	0	0	0.001637
2	104.444	4.65952	0	0	56.4	43.6	0	0.000318
1	40.02	1.2377	30.2759	99.99	0	0	0	0.00017
1	71	20	0	28.3	71.7	0	0	0.000716
1	40.02	0.89111	37.3512	99.99	0	0	0	0.00013
1	80.14	1.4733	22.9263	99.99	0	0	0	0.00018
1	40.02	4.2623	15.6568	99.99	0	0	0	0.00069
1	100.06	1.0038	15.6568	99.99	0	0	0	0.00012
2	5.11	19.65	0	76.77	15.51	7.72	0	6.4e-05
1	104.444	35.1391	0	61.1	17.78	21.1	0	0.003162
1	125	20.804	5.52133	99.95	0	0	0	0.001752
1	104.444	5.00986	0	50.15	0	49.85	0	0.001525
1	100.02	9.6657	7.00242	99.99	0	0	0	0.00129
1	39.95	15.2	0	99.99	0	0	0	0.002048
3	95.01	2.997	0	0	0	99.99	0	0.0002236
2	71.1111	0.791769	0	0	99.99	0	0	8.12e-05
1	80	0.60762	7.91698	99.99	0	0	0	8e-05
1	9.91	20	0	76.77	15.51	7.72	0	0.00179
1	100.06	7.2448	15.6568	99.99	0	0	0	0.00089
1	40.02	1.1291	15.6568	99.99	0	0	0	0.00019
1	40.02	3.8045	30.2759	99.99	0	0	0	0.00048
2	39.97	7.46	0	94	4	0	2	4.06e-05
3	49.98	0.425	0	0	0	99.99	0	5.98e-05
2	37.7778	2.38231	0	0	99.99	0	0	0.000521
3	12.24	20.1	0	76.77	15.51	7.72	0	8e-06
1	19.95	2.53	0	99.99	0	0	0	0.000602
3	104.444	56.1595	0	39.67	0	60.33	0	0.001398
1	104.444	35.1391	0	20.4	0	79.6	0	0.001616
2	20.05	3	0	0	99.99	0	0	0.000864
1	40.05	1.233	9.54819	99.99	0	0	0	0.00018
1	24.99	2.964	0	94	4	0	2	0.000637
1	25	4.08941	0	99.99	0	0	0	0.00081
2	14	20	4.01	75.31	16.16	8.53	0	0.000137
1	71.1111	55.4588	0	49.9	50.1	0	0	0.002804
1	125	14.2874	23.9877	99.99	0	0	0	0.000409
3	65	2.292	0	0	0	99.99	0	0.0002082
3	16	14.14	0	76.77	15.51	7.72	0	1.8e-05
3	80.03	2.483	0	0	0	99.99	0	0.0002006
1	25	21.1303	23.056	99.99	0	0	0	0.0008
1	104.444	5.00986	0	86.45	0	13.55	0	0.00113
1	80.06	5.6365	9.58286	99.99	0	0	0	0.00066
1	100	14.3792	23.9877	99.99	0	0	0	0.000425
3	14	20	4.01	75.31	16.16	8.53	0	2e-05
2	171.111	9.59932	0	0	99.99	0	0	0.001311
1	14	20	0.82	75.31	16.16	8.53	0	0.00176
1	51.5	50.9901	5.52133	99.95	0	0	0	0.00279
1	125	8.7805	12.7476	99.99	0	0	0	0.00052
3	95.01	1.433	0	0	0	99.99	0	0.0001203
1	24.99	0.994	0	94	4	0	2	0.000218
1	100	21.8646	23.9877	99.99	0	0	0	0.000565
1	24.45	8.76	0	99.99	0	0	0	0.000876
1	125	51.704	0	99.95	0	0	0	0.00396
1	17.8	20	0	76.77	15.51	7.72	0	0.00274
3	9.88	20	0	76.77	15.51	7.72	0	1.4e-05
1	40	0.93223	22.9263	99.99	0	0	0	0.00015
1	39.96	2.534	0	99.99	0	0	0	0.000443
1	40	4.337	22.9263	99.99	0	0	0	0.00066
4	15.02	3.068	0	94	4	0	2	7.34e-06
2	37.7778	40.6395	0	0	99.99	0	0	0.001066
2	71.1111	34.7888	0	71	29	0	0	0.001196
3	14.11	19.1	0	76.77	15.51	7.72	0	1e-05
3	104.444	21.1255	0	72.8	0	27.2	0	0.000705
4	15.01	1.038	0	94	4	0	2	5.77e-06
1	102.5	51.296	5.52133	99.95	0	0	0	0.00289
4	71	50	0	0.01	0	0	99.99	9.2e-05
1	104.444	28.1323	0	50.23	25.27	24.5	0	0.002676
1	80	0.95423	30.2337	99.99	0	0	0	0.0001
2	14	20	1.83	75.31	16.16	8.53	0	0.000142
1	39.95	40.53	0	99.99	0	0	0	0.003653
1	25	14.6851	0	99.99	0	0	0	0.00187
1	51.5	61.1881	5.52133	99.95	0	0	0	0.00307
1	125	4.93584	0	99.99	0	0	0	0.00064
1	24.02	20	0	76.77	15.51	7.72	0	0.00254
1	71	50	0	45.5	0	0	54.5	0.001884
2	16.05	20.1	0	76.77	15.51	7.72	0	8.2e-05
3	104.444	56.1595	0	0	40.59	59.41	0	0.000625
1	80.14	8.4943	22.9263	99.99	0	0	0	0.00093
1	87.7778	35.034	0	70.15	10.65	19.2	0	0.00283
1	40.05	0.90385	25.3022	99.99	0	0	0	8e-05
1	150	8.2196	0	99.99	0	0	0	0.00093
3	65	2.008	0	0	0	99.99	0	0.0001899
1	51.5	40.7921	18.947	99.95	0	0	0	0.001154
2	71.1111	22.9473	0	0	99.99	0	0	0.000895
2	37.7778	35.2793	0	0	99.99	0	0	0.001018
1	51.5	30.5941	18.947	99.95	0	0	0	0.000997
1	40.05	1.5343	9.54819	99.99	0	0	0	0.00022
1	5.14	20	0	76.77	15.51	7.72	0	0.00134
1	57.95	40.53	0	99.99	0	0	0	0.003348
1	51.5	30.5941	0	99.95	0	0	0	0.00287
3	95.01	2.495	0	0	0	99.99	0	0.0001989
2	104.444	14.469	0	70.15	10.65	19.2	0	0.00026
2	12.1	20	0	76.77	15.51	7.72	0	6e-05
3	104.444	5.00986	0	20.4	0	79.6	0	0.000898
1	2.05	1	0	90.13	9.87	0	0	0.000711
2	104.444	4.65952	0	0	40.59	59.41	0	0.000294
2	14	20	0.045	75.31	16.16	8.53	0	0.000121
1	71	10	0	83	0	0	17	0.001211
4	71	20	0	4.3	0	0	95.7	8.4e-05
2	15.02	3.068	0	94	4	0	2	3.99e-05
3	104.444	4.65952	0	25.94	35.58	38.48	0	0.000216
1	40.05	0.50722	9.54819	99.99	0	0	0	8e-05
1	80.14	0.53694	15.7099	99.99	0	0	0	7e-05
1	20.05	18	0	99.99	0	0	0	0.002988
1	150	17.7955	23.9877	99.99	0	0	0	0.000455
2	71.1111	21.4759	0	49.9	50.1	0	0	0.001302
1	25	10.3306	5.52133	99.99	0	0	0	0.00114
1	10	3.079	0	94	4	0	2	0.000826
1	12.01	9.22	0	76.77	15.51	7.72	0	0.00186
1	25	20.1717	21.7413	99.99	0	0	0	0.00109
3	65	1.632	0	0	0	99.99	0	0.0001621
2	10	3.415	0	94	4	0	2	4.36e-05
3	95.01	1.028	0	0	0	99.99	0	8.91e-05
2	171.111	65.4085	0	0	99.99	0	0	0.0032
2	104.444	14.1187	0	0	22.14	77.86	0	0.000301
4	71	75	0	23	0	0	77	7.6e-05
1	51.5	20.396	5.52133	99.95	0	0	0	0.001695
2	14	20	1.24	75.31	16.16	8.53	0	0.000117
1	14	20	1.24	75.31	16.16	8.53	0	0.00172
2	14	20	4.02	75.31	16.16	8.53	0	0.000142
3	104.444	21.1255	0	86.45	0	13.55	0	0.000315
1	79.95	50.66	0	99.99	0	0	0	0.003581
1	104.444	14.469	0	61.1	17.78	21.1	0	0.002244
1	40.02	5.66	22.9996	99.99	0	0	0	0.00093
1	104.444	14.469	0	50.15	0	49.85	0	0.002016
3	4.94	0.357	0	0	0	99.99	0	0.0002107
2	104.444	49.1177	0	0	99.99	0	0	0.001329
1	102.5	30.798	5.52133	99.95	0	0	0	0.002219
1	25	10.2184	10.2708	99.99	0	0	0	0.00085
2	71.1111	4.65952	0	19.96	80.04	0	0	0.000696
1	50	18.4074	12.7476	99.99	0	0	0	0.00113
1	104.444	4.65952	0	70.15	10.65	19.2	0	0.001175
1	25	22.5988	12.7476	99.99	0	0	0	0.00136
4	24.99	0.994	0	94	4	0	2	3.87e-06
3	65	0.697	0	0	0	99.99	0	7.66e-05
1	80.14	9.5128	6.87329	99.99	0	0	0	0.00124
3	104.444	28.1323	0	61.1	17.78	21.1	0	0.000111
1	80.06	7.9407	9.58286	99.99	0	0	0	0.0009
1	104.444	28.1323	0	25.94	35.58	38.48	0	0.001635
1	104.444	5.00986	0	20.4	0	79.6	0	0.000862
1	80	0.31137	7.91698	99.99	0	0	0	4e-05
4	71	100	0	0.01	0	0	99.99	9.8e-05
2	14.08	16.08	0	76.77	15.51	7.72	0	8.6e-05
1	2.57	20	0	76.77	15.51	7.72	0	0.00099
2	5.01	8.27	0	76.77	15.51	7.72	0	4.8e-05
1	40.02	6.7384	37.3512	99.99	0	0	0	0.00085
1	40.05	1.5484	25.3022	99.99	0	0	0	0.00014
2	125	41.302	18.947	99.95	99.95	0	0	0.001164
2	125	62.004	18.947	99.95	99.95	0	0	0.001438
1	75	7.97485	0	99.99	0	0	0	0.00101
2	37.7778	44.3531	0	0	99.99	0	0	0.001105
1	25	11.2382	28.8106	99.99	0	0	0	0.00094
1	150	14.369	23.9877	99.99	0	0	0	0.000395
2	71.1111	21.4759	0	85.36	14.64	0	0	0.000556
2	30.05	1.5	0	0	99.99	0	0	0.000532
2	104.444	28.1323	0	50.23	25.27	24.5	0	0.000906
1	14	20	2.88	75.31	16.16	8.53	0	0.00184
1	71.1111	14.469	0	40.5	59.5	0	0	0.001382
1	75	17.7344	0	99.99	0	0	0	0.00174
1	104.444	28.1323	0	82.18	9.45	8.37	0	0.002842
1	39.95	2.53	0	99.99	0	0	0	0.000482
1	40.05	5.6429	25.3022	99.99	0	0	0	0.00047
1	25	32.7356	12.7476	99.99	0	0	0	0.00155
1	100	18.2443	23.9877	99.99	0	0	0	0.000495
1	112.15	2.092	0	99.99	0	0	0	0.0002985
1	80.14	5.8199	15.7099	99.99	0	0	0	0.00073
2	14.07	15.99	0	76.77	15.51	7.72	0	9.4e-05
1	57.95	60.8	0	99.99	0	0	0	0.004047
1	102.5	20.498	5.52133	99.95	0	0	0	0.001693
1	51.5	61.1881	0	99.95	0	0	0	0.00409
2	104.444	4.65952	0	0	22.14	77.86	0	0.000208
2	1.4	20	0	76.77	15.51	7.72	0	4e-05
2	10	2.077	0	94	4	0	2	3.02e-05
1	71	2.5	0	83	0	0	17	0.000348
2	104.444	35.034	0	70.15	10.65	19.2	0	0.000367
4	71	20	0	0.01	0	0	99.99	9.3e-05
1	14.05	15.85	0	76.77	15.51	7.72	0	0.00175
1	51.5	61.1881	18.947	99.95	0	0	0	0.001444
1	104.444	21.1255	0	39.67	0	60.33	0	0.002198
1	10.05	6.05	0	99.99	0	0	0	0.001585
2	2.57	20	0	76.77	15.51	7.72	0	4.7e-05
4	10.01	1.988	0	94	4	0	2	7.54e-06
3	104.444	21.1255	0	82.18	9.45	8.37	0	7.9e-05
1	80.06	1.7999	9.58286	99.99	0	0	0	0.00022
1	200.05	3.21	0	99.99	0	0	0	0.0004146
1	71.1111	55.4588	0	19.96	80.04	0	0	0.001564
1	25	15.2766	15.7546	99.99	0	0	0	0.00082
1	80	3.7561	17.6621	99.99	0	0	0	0.00049
1	71.1111	4.65952	0	40.5	59.5	0	0	0.000779
1	24.75	10	0	99.99	0	0	0	0.001
1	40.02	8.1533	37.3512	99.99	0	0	0	0.001
1	30.05	35.08	0	99.99	0	0	0	0.003659
2	104.444	35.1391	0	50.23	25.27	24.5	0	0.000998
1	40.02	4.2749	37.3512	99.99	0	0	0	0.00057
3	80.03	0.696	0	0	0	99.99	0	6.46e-05
1	25	14.1854	23.9877	99.99	0	0	0	0.00049
4	39.97	7.46	0	94	4	0	2	6.94e-06
1	71.1111	55.4588	0	85.36	14.64	0	0	0.003366
1	40.02	2.2456	30.2759	99.99	0	0	0	0.0003
1	150	4.74208	0	99.99	0	0	0	0.00062
3	9.91	20	0	76.77	15.51	7.72	0	1.9e-05
1	104.444	56.1595	0	86.45	0	13.55	0	0.0037
1	25	15.2664	9.03699	99.99	0	0	0	0.00126
2	14	20	0.21	75.31	16.16	8.53	0	0.000115
4	71	10	0	83	0	0	17	2.5e-05
2	104.444	4.65952	0	0	70.05	29.95	0	0.000367
1	25	11.2688	0	99.99	0	0	0	0.00158
2	137.778	14.7493	0	0	99.99	0	0	0.001208
3	104.444	4.65952	0	82.18	9.45	8.37	0	4e-05
3	104.444	21.1255	0	0	70.05	29.95	0	0.000457
1	80	9.2326	17.6621	99.99	0	0	0	0.00107
3	22.13	20	0	76.77	15.51	7.72	0	2.5e-05
1	40.02	1.6805	22.9996	99.99	0	0	0	0.0003
1	25	20.2125	15.7546	99.99	0	0	0	0.00095
1	40.02	4.0756	7.99056	99.99	0	0	0	0.00068
1	104.444	21.1255	0	70.15	10.65	19.2	0	0.002614
1	100.14	9.2595	0	99.99	0	0	0	0.00125
1	40.05	4.5864	9.54819	99.99	0	0	0	0.00063
1	71	5	0	45.5	0	0	54.5	0.000636
1	104.444	35.1391	0	39.67	0	60.33	0	0.002468
1	87.7778	35.034	0	49.9	50.1	0	0	0.00219
2	71.1111	45.4391	0	0	99.99	0	0	0.001078
2	10.05	0.5	0	0	99.99	0	0	0.00031
1	245.15	6.451	0	99.99	0	0	0	0.0010337
3	104.444	35.1391	0	39.67	0	60.33	0	0.001234
1	80.08	6.807	23.4207	99.99	0	0	0	0.00088
3	95.01	1.94	0	0	0	99.99	0	0.0001586
1	40.02	4.1414	22.9996	99.99	0	0	0	0.00071
3	25.98	20	0	76.77	15.51	7.72	0	4.2e-05
1	80.08	1.5106	23.4207	99.99	0	0	0	0.00021
3	104.444	14.1187	0	0	40.59	59.41	0	0.000503
2	137.778	10.3	0	0	99.99	0	0	0.001065
1	80.14	0.88693	15.7099	99.99	0	0	0	0.00011
1	71.1111	4.65952	0	19.96	80.04	0	0	0.00045
2	16.05	20	0	76.77	15.51	7.72	0	0.000108
1	5.07	16.12	0	76.77	15.51	7.72	0	0.0011
3	19.98	0.399	0	0	0	99.99	0	0.0001229
4	71	2.5	0	83	0	0	17	2.1e-05
3	14	20	0.82	75.31	16.16	8.53	0	1.7e-05
1	104.444	14.469	0	86.45	0	13.55	0	0.00186
2	104.444	21.1255	0	0	70.05	29.95	0	0.000653
2	10.05	4	0	90.13	9.87	0	0	0.0001447
1	80.06	1.2677	9.58286	99.99	0	0	0	0.00015
1	71	75	0	23	0	0	77	0.001118
1	79.95	5.07	0	99.99	0	0	0	0.000691
2	104.444	24.2085	0	0	99.99	0	0	0.001132
1	100.02	0.50137	7.00242	99.99	0	0	0	6e-05
1	9.75	9.26	0	99.99	0	0	0	0.000926
1	80.06	0.77049	17.0545	99.99	0	0	0	7e-05
1	125	31.104	5.52133	99.95	0	0	0	0.002223
1	40.2	8.4257	0	99.99	0	0	0	0.00154
2	4.93	8.23	0	76.77	15.51	7.72	0	5.2e-05
3	14.05	15.85	0	76.77	15.51	7.72	0	9e-06
2	24.99	11.749	0	94	4	0	2	6.74e-05
2	104.444	56.1595	0	0	70.05	29.95	0	0.000798
1	40.36	3.1845	6.87329	99.99	0	0	0	0.00059
2	104.444	14.1187	0	0	81.51	18.49	0	0.000672
1	10.05	4.04	0	99.99	0	0	0	0.001096
1	10.05	4	0	90.13	9.87	0	0	0.00115
2	10	3.079	0	94	4	0	2	3.85e-05
2	20	20	0	76.77	15.51	7.72	0	0.000159
1	104.444	21.1255	0	50.23	25.27	24.5	0	0.00237
2	71.1111	4.65952	0	49.9	50.1	0	0	0.000593
3	14.98	0.596	0	0	0	99.99	0	0.000208
1	100.14	7.8315	0	99.99	0	0	0	0.00108
1	80.08	8.4062	23.4207	99.99	0	0	0	0.00107
1	50	11.4116	23.9877	99.99	0	0	0	0.000383
3	49.98	0.898	0	0	0	99.99	0	0.0001199
2	37.7778	1.40136	0	0	99.99	0	0	0.000311
1	40.02	9.341	15.6568	99.99	0	0	0	0.00136
1	102.5	61.596	5.52133	99.95	0	0	0	0.0032
2	104.444	21.1255	0	0	22.14	77.86	0	0.000316
1	80.14	6.0558	22.9263	99.99	0	0	0	0.00069
1	125	22.5274	23.9877	99.99	0	0	0	0.000548
1	75	8.82129	12.7476	99.99	0	0	0	0.00062
2	37.7778	66.2493	0	0	99.99	0	0	0.00113
1	25	14.7973	10.2708	99.99	0	0	0	0.00117
3	4.94	0.357	0	0	0	99.99	0	0.0002061
1	39.95	60.8	0	99.99	0	0	0	0.004328
3	24.02	20	0	76.77	15.51	7.72	0	2.9e-05
1	100	22.5988	12.7476	99.99	0	0	0	0.00112
1	25	10.3306	21.7413	99.99	0	0	0	0.00067
3	14	20	4.02	75.31	16.16	8.53	0	3.1e-05
3	104.444	21.1255	0	70.15	10.65	19.2	0	0.000187
3	16	20	0	76.77	15.51	7.72	0	9e-06
1	40.02	0.49674	22.9996	99.99	0	0	0	9e-05
1	12.24	20.1	0	76.77	15.51	7.72	0	0.00176
1	80.03	9.0253	0	99.99	0	0	0	0.00124
2	71	75	0	0.01	99.99	0	0	0.001284
2	137.778	18.7782	0	0	99.99	0	0	0.001384
3	24.97	0.493	0	0	0	99.99	0	0.0001244
1	10	2.077	0	94	4	0	2	0.000593
3	104.444	35.034	0	70.15	10.65	19.2	0	0.000225
1	100.06	6.5194	15.6568	99.99	0	0	0	0.00081
1	40.05	7.6925	9.54819	99.99	0	0	0	0.00099
1	100.06	9.7905	22.9263	99.99	0	0	0	0.00111
1	125	18.336	12.7476	99.99	0	0	0	0.00094
3	104.444	56.1595	0	86.45	0	13.55	0	0.0005
1	100	21.0589	0	99.99	0	0	0	0.00184
1	50	14.6546	0	99.99	0	0	0	0.00169
1	5.01	8.27	0	76.77	15.51	7.72	0	0.00113
1	80	0.38894	17.6621	99.99	0	0	0	5e-05
1	104.444	28.1323	0	61.1	17.78	21.1	0	0.002882
2	5.07	20	0	76.77	15.51	7.72	0	5.6e-05
1	9.99	0.987	0	94	4	0	2	0.000295
4	71	10	0	23	0	0	77	4.4e-05
3	80.03	0.972	0	0	0	99.99	0	9.17e-05
1	19.95	15.2	0	99.99	0	0	0	0.002529
1	25	15.3582	13.6284	99.99	0	0	0	0.00098
2	10.05	3	0	90.13	9.87	0	0	0.0001412
1	100.02	5.7485	7.00242	99.99	0	0	0	0.00079
3	16.05	20	0	76.77	15.51	7.72	0	1.8e-05
3	14	20	0.52	75.31	16.16	8.53	0	1e-05
1	40.05	8.098	25.3022	99.99	0	0	0	0.00064
1	80.14	5.7145	6.87329	99.99	0	0	0	0.00079
2	20.05	2	0	0	99.99	0	0	0.000751
1	40.36	4.3068	6.87329	99.99	0	0	0	0.00078
1	25	17.8975	23.9877	99.99	0	0	0	0.00056
2	71.1111	3.58748	0	0	99.99	0	0	0.000417
1	104.444	21.1255	0	50.15	0	49.85	0	0.002282
1	100	8.57653	23.9877	99.99	0	0	0	0.000281
2	104.444	34.7888	0	0	70.05	29.95	0	0.000707
3	34.98	0.848	0	0	0	99.99	0	0.0001525
1	14	20	1.37	75.31	16.16	8.53	0	0.00169
2	104.444	4.65952	0	82.18	9.45	8.37	0	0.000119
1	80.14	1.0567	6.87329	99.99	0	0	0	0.00015
1	104.444	4.65952	0	61.1	17.78	21.1	0	0.001276
1	100	5.22139	12.7476	99.99	0	0	0	0.00033
2	16.04	16.12	0	76.77	15.51	7.72	0	9.3e-05
1	39.95	25.33	0	99.99	0	0	0	0.002786
3	104.444	56.1595	0	20.4	0	79.6	0	0.001863
1	19.55	7.03	0	99.99	0	0	0	0.000703
2	71	100	0	0.01	99.99	0	0	0.001398
2	22.95	20	0	76.77	15.51	7.72	0	0.000222
3	24.97	0.58	0	0	0	99.99	0	0.0001438
2	137.778	3.90279	0	0	99.99	0	0	0.000464
1	80.08	7.9501	37.3512	99.99	0	0	0	0.0008
1	100.02	7.2052	7.00242	99.99	0	0	0	0.00098
1	71	75	0	4.3	0	0	95.7	0.000233
3	104.444	21.1255	0	25.94	35.58	38.48	0	0.000427
2	104.444	35.1391	0	61.1	17.78	21.1	0	0.000672
1	40.02	2.7193	37.3512	99.99	0	0	0	0.00037
1	10.05	2	0	90.13	9.87	0	0	0.000947
1	80.03	0.34043	0	99.99	0	0	0	5e-05
1	80.14	5.7971	22.9263	99.99	0	0	0	0.00066
1	57.95	30.4	0	99.99	0	0	0	0.002802
2	104.444	28.1323	0	70.15	10.65	19.2	0	0.000328
1	80.08	2.3514	37.3512	99.99	0	0	0	0.00026
1	100.06	0.53079	22.9263	99.99	0	0	0	6e-05
1	100.06	5.7248	22.9263	99.99	0	0	0	0.00067
1	25	44.8203	23.9877	99.99	0	0	0	0.00085
1	80.06	5.6475	17.0545	99.99	0	0	0	0.00052
2	104.444	14.2238	0	0	99.99	0	0	0.000964
3	5.01	8.27	0	76.77	15.51	7.72	0	8e-06
1	100.02	8.6953	7.00242	99.99	0	0	0	0.00117
1	25	6.01683	18.947	99.99	0	0	0	0.00031
3	20.92	20	0	76.77	15.51	7.72	0	1.2e-05
1	25	9.98386	15.7546	99.99	0	0	0	0.00062
2	9.88	20	0	76.77	15.51	7.72	0	6e-05
1	71	100	0	28.3	71.7	0	0	0.001601
1	16.71	20	0	76.77	15.51	7.72	0	0.00247
4	71	20	0	83	0	0	17	2.4e-05
1	57.95	2.53	0	99.99	0	0	0	0.000393
1	100.06	1.8036	22.9263	99.99	0	0	0	0.00021
2	104.444	4.65952	0	0	81.51	18.49	0	0.000377
2	171.111	68.9119	0	0	99.99	0	0	0.0033
1	16	20	0	76.77	15.51	7.72	0	0.00224
2	24.99	7.257	0	94	4	0	2	5.62e-05
3	80.03	0.404	0	0	0	99.99	0	3.68e-05
3	16.06	20.1	0	76.77	15.51	7.72	0	1e-05
3	9.91	0.522	0	0	0	99.99	0	0.0002266
1	79.95	10.13	0	99.99	0	0	0	0.001261
1	125	17.6936	23.9877	99.99	0	0	0	0.000475
2	2.05	1	0	90.13	9.87	0	0	0.0001128
1	40	1.219	22.9263	99.99	0	0	0	0.0002
4	71	5	0	45.5	0	0	54.5	4.1e-05
1	80.14	1.4166	6.87329	99.99	0	0	0	0.0002
2	104.444	17.7622	0	0	99.99	0	0	0.001042
2	7.49	20	0	76.77	15.51	7.72	0	4.2e-05
3	104.444	56.1595	0	0	56.4	43.6	0	0.000642
1	50	11.381	0	99.99	0	0	0	0.00142
1	30.05	25.15	0	99.99	0	0	0	0.003082
1	9.85	3.13	0	99.99	0	0	0	0.000313
1	71	75	0	99.99	0	0	0.01	0.00466
1	51.5	20.396	18.947	99.95	0	0	0	0.000805
3	104.444	35.1391	0	50.23	25.27	24.5	0	3.9e-05
1	80.03	2.8411	0	99.99	0	0	0	0.00042
1	50	21.8544	23.9877	99.99	0	0	0	0.000601
1	40	3.0936	22.9263	99.99	0	0	0	0.00048
2	171.111	58.2966	0	0	99.99	0	0	0.00306
3	104.444	14.469	0	61.1	17.78	21.1	0	8.6e-05
2	30.05	3.1	0	0	99.99	0	0	0.000756
1	25	16.1945	18.947	99.99	0	0	0	0.00063
1	125	62.004	5.52133	99.95	0	0	0	0.00325
1	25.98	20	0	76.77	15.51	7.72	0	0.00237
1	40.05	7.0294	9.54819	99.99	0	0	0	0.00092
1	30.05	30.11	0	99.99	0	0	0	0.003381
1	80.06	3.0424	17.0545	99.99	0	0	0	0.00029
1	80.14	3.2024	15.7099	99.99	0	0	0	0.00042
1	80	0.72616	17.6621	99.99	0	0	0	9e-05
1	71.1111	35.034	0	70.15	10.65	19.2	0	0.00278
1	39.95	50.66	0	99.99	0	0	0	0.003983
1	39.96	1.025	0	99.99	0	0	0	0.000204
1	71.1111	34.7888	0	19.96	80.04	0	0	0.001158
3	1.4	20	0	76.77	15.51	7.72	0	1.3e-05
1	50	8.28079	0	99.99	0	0	0	0.00112
3	19.98	0.8	0	0	0	99.99	0	0.0002249
1	50	8.36238	23.9877	99.99	0	0	0	0.000295
2	30.05	4	0	0	99.99	0	0	0.000864
1	20.05	21	0	99.99	0	0	0	0.003111
4	71	100	0	23	0	0	77	7.5e-05
1	102.5	30.798	0	99.95	0	0	0	0.00287
1	24.99	14.407	0	94	4	0	2	0.002191
2	20.05	1	0	0	99.99	0	0	0.000477
1	80.14	1.6033	15.7099	99.99	0	0	0	0.00021
1	80	0.32506	30.2337	99.99	0	0	0	3e-05
3	104.444	56.1595	0	0	81.51	18.49	0	0.000464
3	104.444	4.65952	0	0	56.4	43.6	0	0.000317
3	5.06	12.22	0	76.77	15.51	7.72	0	1.1e-05
1	104.444	35.1391	0	50.15	0	49.85	0	0.002642
1	40.02	8.1365	30.2759	99.99	0	0	0	0.00095
1	54.4444	35.034	0	49.9	50.1	0	0	0.00215
1	15.01	1.038	0	94	4	0	2	0.000282
1	80.08	4.4373	23.4207	99.99	0	0	0	0.00059
1	71.1111	34.7888	0	40.5	59.5	0	0	0.001988
1	14.11	19.1	0	76.77	15.51	7.72	0	0.00173
1	25	10.6569	9.03699	99.99	0	0	0	0.001
3	14.05	11.73	0	76.77	15.51	7.72	0	2.7e-05
1	1.96	0.973	0	99.99	0	0	0	0.000399
1	75	20.9365	0	99.99	0	0	0	0.00193
1	80.06	7.5822	17.0545	99.99	0	0	0	0.00067
2	104.444	56.1595	0	0	40.59	59.41	0	0.000556
1	71	20	0	48.2	51.8	0	0	0.001127
1	100	5.06842	23.9877	99.99	0	0	0	0.000186
1	14.55	18.5	0	99.99	0	0	0	0.00185
3	11.93	6.22	0	76.77	15.51	7.72	0	8e-06
1	25	5.922	0	99.99	0	0	0	0.001238
1	24.98	15.907	0	99.99	0	0	0	0.002459
3	14	20	1.24	75.31	16.16	8.53	0	2.7e-05
1	150	17.8975	0	99.99	0	0	0	0.0016
1	100.02	1.641	7.00242	99.99	0	0	0	0.00022
2	104.444	7.84762	0	0	99.99	0	0	0.000661
2	5.06	12.22	0	76.77	15.51	7.72	0	5.6e-05
1	25	20.8142	5.52133	99.99	0	0	0	0.00173
3	16.04	16.12	0	76.77	15.51	7.72	0	1.2e-05
1	16.04	16.12	0	76.77	15.51	7.72	0	0.00238
1	80.06	4.3833	17.0545	99.99	0	0	0	0.00041
1	104.444	21.1255	0	61.1	17.78	21.1	0	0.00257
1	14.55	7.75	0	99.99	0	0	0	0.000775
2	171.111	18.2527	0	0	99.99	0	0	0.00197
3	104.444	34.7888	0	0	70.05	29.95	0	0.000493
1	25	5.10921	9.03699	99.99	0	0	0	0.00055
1	100	11.4932	23.9877	99.99	0	0	0	0.000365
1	75	11.381	23.9877	99.99	0	0	0	0.000373
2	104.444	37.2762	0	0	99.99	0	0	0.001249
1	25	20.2941	9.03699	99.99	0	0	0	0.00147
3	9.91	0.46	0	0	0	99.99	0	0.0002028
2	10.01	1.988	0	94	4	0	2	2.85e-05
1	125	8.2604	0	99.99	0	0	0	0.00098
3	104.444	56.1595	0	0	70.05	29.95	0	0.000559
1	80.06	6.945	9.58286	99.99	0	0	0	0.0008
2	104.444	14.469	0	25.94	35.58	38.48	0	0.001002
1	40.05	0.87796	9.54819	99.99	0	0	0	0.00013
3	12.1	20	0	76.77	15.51	7.72	0	8e-06
1	80.14	9.5521	15.7099	99.99	0	0	0	0.00113
2	137.778	68.4915	0	0	99.99	0	0	0.002005
2	30.05	2.5	0	0	99.99	0	0	0.000677
1	25	21.783	23.9877	99.99	0	0	0	0.00062
1	104.444	28.1323	0	70.15	10.65	19.2	0	0.002822
1	40	1.4804	22.9263	99.99	0	0	0	0.00024
2	104.444	56.1595	0	0	56.4	43.6	0	0.000648
1	40.02	8.203	15.6568	99.99	0	0	0	0.00122
1	100.06	3.5956	15.6568	99.99	0	0	0	0.00046
1	80	1.0263	7.91698	99.99	0	0	0	0.00014
1	150	11.8195	12.7476	99.99	0	0	0	0.00066
1	80.08	6.8932	37.3512	99.99	0	0	0	0.00071
1	150	8.7805	12.7476	99.99	0	0	0	0.0005
2	14.05	15.85	0	76.77	15.51	7.72	0	0.000104
1	104.444	35.1391	0	25.94	35.58	38.48	0	0.0018
1	71	50	0	48.2	51.8	0	0	0.001792
2	5.12	19.9	0	76.77	15.51	7.72	0	5.6e-05
1	6.15	8.61	0	99.99	0	0	0	0.000861
1	2.05	1.5	0	90.13	9.87	0	0	0.000913
1	80	5.7967	17.6621	99.99	0	0	0	0.00073
1	100	8.27059	0	99.99	0	0	0	0.00101
3	34.98	1.191	0	0	0	99.99	0	0.0002007
2	104.444	1.48544	0	0	99.99	0	0	0.00013
1	40.02	6.0169	15.6568	99.99	0	0	0	0.00094
1	125	11.4218	23.9877	99.99	0	0	0	0.000351
1	104.444	5.00986	0	72.8	0	27.2	0	0.001326
1	40.02	7.0944	15.6568	99.99	0	0	0	0.00107
1	80.08	0.74515	23.4207	99.99	0	0	0	0.0001
1	79.95	15.2	0	99.99	0	0	0	0.001702
1	80.14	8.2023	6.87329	99.99	0	0	0	0.00109
1	57.95	20.27	0	99.99	0	0	0	0.002208
2	104.444	28.1323	0	25.94	35.58	38.48	0	0.001269
1	102.5	41.098	0	99.95	0	0	0	0.00333
3	19.98	0.5	0	0	0	99.99	0	0.000151
2	2.05	1.5	0	90.13	9.87	0	0	0.0001147
2	9.99	0.987	0	94	4	0	2	1.72e-05
3	16.71	20	0	76.77	15.51	7.72	0	1e-05
1	100.06	1.3875	15.6568	99.99	0	0	0	0.00017
2	9.91	20	0	76.77	15.51	7.72	0	7.4e-05
2	37.7778	0.770748	0	0	99.99	0	0	0.000204
2	10.05	1.5	0	0	99.99	0	0	0.0007
1	40.2	3.4912	0	99.99	0	0	0	0.00071
1	40.05	0.48179	25.3022	99.99	0	0	0	4e-05
1	40.05	4.3121	25.3022	99.99	0	0	0	0.00037
1	30.05	15.18	0	99.99	0	0	0	0.002411
2	104.444	21.1255	0	50.23	25.27	24.5	0	0.000803
1	21.99	20	0	76.77	15.51	7.72	0	0.00276
2	5.07	16.12	0	76.77	15.51	7.72	0	5.5e-05
1	19.95	20.27	0	99.99	0	0	0	0.003035
1	25	19.9065	10.2708	99.99	0	0	0	0.00146
1	80	2.4167	17.6621	99.99	0	0	0	0.00032
2	71.1111	21.4759	0	40.5	59.5	0	0	0.001345
1	100.14	3.637	0	99.99	0	0	0	0.00052
3	65	0.403	0	0	0	99.99	0	4.49e-05
1	25	11.0037	18.947	99.99	0	0	0	0.00049
2	137.778	5.15701	0	0	99.99	0	0	0.00066
1	80.03	5.8589	0	99.99	0	0	0	0.00084
3	104.444	34.7888	0	0	81.51	18.49	0	0.000402
1	7.49	20	0	76.77	15.51	7.72	0	0.0015
1	25	14.2874	5.52133	99.99	0	0	0	0.00142
2	104.444	5.26912	0	0	99.99	0	0	0.00056
1	9.85	12.2	0	99.99	0	0	0	0.00122
1	100	14.5016	12.7476	99.99	0	0	0	0.00085
2	5.14	20	0	76.77	15.51	7.72	0	3.8e-05
2	22.13	20	0	76.77	15.51	7.72	0	0.000204
3	14	20	2.88	75.31	16.16	8.53	0	2e-05
3	104.444	21.1255	0	0	22.14	77.86	0	0.000534
3	24.97	0.675	0	0	0	99.99	0	0.000165
1	125	41.302	5.52133	99.95	0	0	0	0.0026
3	104.444	21.1255	0	39.67	0	60.33	0	0.001098
4	71	10	0	0.01	0	0	99.99	9.5e-05
1	100.14	0.54459	0	99.99	0	0	0	7e-05
1	25	14.5322	12.7476	99.99	0	0	0	0.00106
1	24.45	31.1	0	99.99	0	0	0	0.00311
1	157.45	2.131	0	99.99	0	0	0	0.0003025
1	71.1111	55.4588	0	71	29	0	0	0.00317
2	30.05	2	0	0	99.99	0	0	0.000616
1	80.03	4.0328	0	99.99	0	0	0	0.00059
1	14.05	11.73	0	76.77	15.51	7.72	0	0.00207
1	14	20	0.21	75.31	16.16	8.53	0	0.00157
1	14.08	20	0	76.77	15.51	7.72	0	0.00203
1	25	4.88485	15.7546	99.99	0	0	0	0.00035
1	104.444	56.1595	0	20.4	0	79.6	0	0.001787
2	71.1111	4.65952	0	40.5	59.5	0	0	0.000636
1	102.5	51.296	18.947	99.95	0	0	0	0.001319
1	51.5	10.198	0	99.95	0	0	0	0.001427
1	10.05	2	0	99.99	0	0	0	0.000563
1	71.1111	21.4759	0	85.36	14.64	0	0	0.002008
1	14	20	0.32	75.31	16.16	8.53	0	0.00165
3	14.9	20	0	76.77	15.51	7.72	0	8e-06
3	104.444	4.65952	0	50.23	25.27	24.5	0	1.9e-05
2	104.444	4.65952	0	50.23	25.27	24.5	0	0.000398
1	40.05	0.47303	17.4608	99.99	0	0	0	6e-05
1	25	18.4074	12.7476	99.99	0	0	0	0.00122
2	104.444	14.469	0	50.23	25.27	24.5	0	0.0007
3	104.444	4.65952	0	0	70.05	29.95	0	0.000256
2	71.1111	51.5	0	0	99.99	0	0	0.0011
3	104.444	21.1255	0	61.1	17.78	21.1	0	0.000102
1	12.1	16.13	0	76.77	15.51	7.72	0	0.00182
3	7.49	20	0	76.77	15.51	7.72	0	6e-06
1	25	5.6599	28.8106	99.99	0	0	0	0.0005
1	40.02	0.83708	22.9996	99.99	0	0	0	0.00015
1	40.02	0.67874	37.3512	99.99	0	0	0	0.0001
1	40.02	6.7234	22.9996	99.99	0	0	0	0.00109
3	104.444	14.1187	0	0	70.05	29.95	0	0.000415
1	1.96	2.323	0	99.99	0	0	0	0.000901
2	104.444	21.1255	0	82.18	9.45	8.37	0	0.000258
3	104.444	14.469	0	50.15	0	49.85	0	0.000855
1	50	4.94604	23.9877	99.99	0	0	0	0.000195
2	125	31.104	18.947	99.95	99.95	0	0	0.001005
1	80	6.6352	7.91698	99.99	0	0	0	0.00087
1	71.1111	21.4759	0	40.5	59.5	0	0	0.001648
1	79.95	60.8	0	99.99	0	0	0	0.003918
2	14	20	1.37	75.31	16.16	8.53	0	0.000119
1	80	3.2693	7.91698	99.99	0	0	0	0.00045
1	40.36	1.5923	6.87329	99.99	0	0	0	0.00031
1	24.35	1.861	0	99.99	0	0	0	0.0004351
1	71.1111	4.65952	0	49.9	50.1	0	0	0.000819
1	40.05	2.8819	25.3022	99.99	0	0	0	0.00025
1	11.99	8.23	0	76.77	15.51	7.72	0	0.00166
1	40.02	5.5542	30.2759	99.99	0	0	0	0.00068
1	71	2.5	0	45.5	0	0	54.5	0.000278
1	16.05	20	0	76.77	15.51	7.72	0	0.0023
1	80	7.7567	17.6621	99.99	0	0	0	0.00093
2	104.444	59.4177	0	0	99.99	0	0	0.001434
3	12.07	12.04	0	76.77	15.51	7.72	0	1.6e-05
1	80.14	1.9775	22.9263	99.99	0	0	0	0.00024
2	104.444	69.6126	0	0	99.99	0	0	0.001514
1	40.05	9.483	25.3022	99.99	0	0	0	0.00072
2	24.99	14.407	0	94	4	0	2	6.72e-05
2	104.444	21.1255	0	0	56.4	43.6	0	0.000545
1	80.03	0.65724	0	99.99	0	0	0	0.0001
1	104.444	35.1391	0	50.23	25.27	24.5	0	0.002942
3	104.444	4.65952	0	0	40.59	59.41	0	0.000331
4	71	50	0	45.5	0	0	54.5	4.2e-05
1	150	8.24	23.9877	99.99	0	0	0	0.000254
3	14	20	1.37	75.31	16.16	8.53	0	2.3e-05
3	9.91	0.612	0	0	0	99.99	0	0.0002555
4	24.99	2.964	0	94	4	0	2	8.11e-06
3	4.47	0.378	0	0	0	99.99	0	0.0002235
1	80.08	0.49067	23.4207	99.99	0	0	0	6e-05
1	16.05	20.1	0	76.77	15.51	7.72	0	0.00224
1	150	14.8483	12.7476	99.99	0	0	0	0.00077
1	30.05	40.03	0	99.99	0	0	0	0.004049
4	71	50	0	23	0	0	77	8.1e-05
1	25	8.2604	23.9877	99.99	0	0	0	0.00032
1	39.95	10.13	0	99.99	0	0	0	0.001566
3	104.444	4.65952	0	0	22.14	77.86	0	0.000352
1	40.02	8.7769	30.2759	99.99	0	0	0	0.00101
2	104.444	21.1255	0	25.94	35.58	38.48	0	0.00117
1	150	14.6342	0	99.99	0	0	0	0.00142
1	30.05	20.16	0	99.99	0	0	0	0.002783
1	40.02	0.41939	15.6568	99.99	0	0	0	7e-05
4	71	75	0	0.01	0	0	99.99	0.000103
3	49.98	1.665	0	0	0	99.99	0	0.0001957
1	71	20	0	99.99	0	0	0.01	0.002183
1	104.444	21.1255	0	25.94	35.58	38.48	0	0.001508
2	14.11	19.1	0	76.77	15.51	7.72	0	8.8e-05
1	80.14	4.7311	15.7099	99.99	0	0	0	0.0006
1	40.02	0.83099	7.99056	99.99	0	0	0	0.00015
2	71.1111	21.4759	0	71	29	0	0	0.000952
1	79.95	20.27	0	99.99	0	0	0	0.002112
3	2.57	20	0	76.77	15.51	7.72	0	1.1e-05
1	51.5	10.198	5.52133	99.95	0	0	0	0.001076
1	71	50	0	23	0	0	77	0.001003
1	40	0.43503	22.9263	99.99	0	0	0	7e-05
3	104.444	35.1391	0	20.4	0	79.6	0	0.001686
1	40.36	0.48084	6.87329	99.99	0	0	0	9e-05
1	80.14	0.51156	6.87329	99.99	0	0	0	7e-05
3	34.98	1.003	0	0	0	99.99	0	0.0001755
1	30.05	10.22	0	99.99	0	0	0	0.001995
1	125	31.104	0	99.95	0	0	0	0.00296
1	80.08	0.38266	37.3512	99.99	0	0	0	4e-05
1	40	7.7622	22.9263	99.99	0	0	0	0.0011
2	71.1111	14.469	0	49.9	50.1	0	0	0.001057
3	14.08	20	0	76.77	15.51	7.72	0	6e-06
1	71	2.5	0	23	0	0	77	0.000253
3	14.98	0.39	0	0	0	99.99	0	0.0001423
2	104.444	21.1255	0	0	81.51	18.49	0	0.000744
2	71	50	0	0	99.99	0	0	0.001146
1	10.05	3	0	90.13	9.87	0	0	0.001066
3	9.91	0.401	0	0	0	99.99	0	0.0001796
2	14.08	20	0	76.77	15.51	7.72	0	6.2e-05
3	104.444	4.65952	0	0	81.51	18.49	0	0.000188
1	57.95	10.13	0	99.99	0	0	0	0.001365
1	71	20	0	23	0	0	77	0.000799
1	75	14.267	23.9877	99.99	0	0	0	0.000444
1	40.2	6.001	0	99.99	0	0	0	0.00115
2	171.111	13.9085	0	0	99.99	0	0	0.001671
1	9.97	1.81	0	99.99	0	0	0	0.000558
1	15.02	3.068	0	94	4	0	2	0.000755
3	104.444	21.1255	0	20.4	0	79.6	0	0.00151
3	71.1111	35.034	0	70.15	10.65	19.2	0	0.000198
1	10.01	1.988	0	94	4	0	2	0.000566
1	125	62.004	18.947	99.95	99.95	0	0	0.001438
1	80.03	8.4176	0	99.99	0	0	0	0.00117
1	25	32.6337	23.9877	99.99	0	0	0	0.00075
1	57.95	50.66	0	99.99	0	0	0	0.003677
2	16	20	0	76.77	15.51	7.72	0	8.2e-05
1	71.1111	34.7888	0	71	29	0	0	0.002323
1	71	75	0	99.99	0.01	0	0	0.00466
1	80.08	5.4384	23.4207	99.99	0	0	0	0.00072
3	104.444	14.1187	0	0	81.51	18.49	0	0.000332
1	71	100	0	99.99	0	0	0.01	0.005085
1	25	4.83386	10.2708	99.99	0	0	0	0.00043
1	10	3.415	0	94	4	0	2	0.000896
1	40.02	0.49626	30.2759	99.99	0	0	0	7e-05
1	12.05	10.49	0	76.77	15.51	7.72	0	0.00181
4	71	2.5	0	45.5	0	0	54.5	5e-05
3	6.99	0.557	0	0	0	99.99	0	0.0002694
1	75	22.4866	23.9877	99.99	0	0	0	0.000585
1	80.14	7.4237	22.9263	99.99	0	0	0	0.00083
3	24.97	0.812	0	0	0	99.99	0	0.0001938
1	104.444	56.1595	0	39.67	0	60.33	0	0.002792
1	79.95	30.4	0	99.99	0	0	0	0.002722
1	71	100	0	48.2	51.8	0	0	0.002561
1	150	22.4152	23.9877	99.99	0	0	0	0.000539
1	25	33.2965	0	99.99	0	0	0	0.00269
1	104.444	4.65952	0	25.94	35.58	38.48	0	0.000768
2	104.444	34.7888	0	0	40.59	59.41	0	0.000515
1	80.06	1.1247	17.0545	99.99	0	0	0	0.00011
2	71.1111	35.034	0	70.15	10.65	19.2	0	0.000323
